# Supplementary material
Source: publisher figshare collection journal article supplement (https://gsapubs.figshare.com/articles/dataset/_/12541442)
Supplement: Supplementary file 1 [file 1]

## Sheet: Cox and Hawkesworth 1985
	Full Citation		Cox, K. G. and Hawkesworth, C.J. (1985) Geochemical Stratigraphy of the Deccan Traps at Mahabaleshwar, Western Ghats, India, with Implications for Open System Magmatic Processes; Journal of Petrology, v. 26(2); pp. 355 - 377.
	Location of the sampling		Mahabaleshwar Section (Mahabaleshwar - Poladpur & Varandha Ghats & Kamashedi (? Kasheli) Ghat section)
	Analysis done at		Oxford University & Open University (Milton Keynes)
	Variation diagrams plotted		Fig. 2: Analytical parameters plotted against calculated stratigraphic heights fom the lower part of sequence
			Fig. 3: Analytical parameters plotted against calculated stratigraphic heights fom the upper part of sequence
			Fig. 4: MgO variation diagrams for all samples with 87Sr/86Sr < 0-706.
			Fig. 5-8: Formation plots
	Formation Name assigned by authors		Bushe	Bushe	Bushe	L Poladpur	L Poladpur	L Poladpur	L Poladpur	L Poladpur	L Poladpur	U Poladpur	U Poladpur	U Poladpur	U Poladpur	Ambenali	Ambenali	Ambenali	Ambenali	Ambenali	Ambenali	Ambenali	Ambenali	Ambenali	Ambenali	Ambenali	mahabaleshwar	mahabaleshwar	mahabaleshwar	mahabaleshwar	mahabaleshwar	mahabaleshwar	mahabaleshwar
	Chemical Types assigned by authors
	Sample No (as in paper)		ABC38	ABC39	ABC40	ABC30BL	ABC32	ABC34	ABC35	ABC41	ABC42	ABC27	ABC29	ABC44	ABC45	ABC11	ABC12	ABC13	ABC17	ABC24	ABC26	ABC46	ABC49	ABC50	ABC52	733/M	ABC3	ABC5	ABC10	ABC18	ABC19	ABC20	ABC21
	Altitude of Sample (if given)		91	152	213	152	61	91	160	244	302	274	168	381	503	890	823	716	869	387	305	559	697	745	788	877	1161	1103	1060	884	899	914	972
	Altitude of Sample (as can be inferred)
	Sr no of analysis in Paper		1	2	3	4	5	6	7	8	9	10	11	12	13	14	15	16	17	18	19	20	21	22	23	24	25	26	27	28	29	30	31
	Sr no in Data base		CH85 01	CH85 02	CH85 03	CH85 04	CH85 05	CH85 06	CH85 07	CH85 08	CH85 09	CH85 10	CH85 11	CH85 12	CH85 13	CH85 14	CH85 15	CH85 16	CH85 17	CH85 18	CH85 19	CH85 20	CH85 21	CH85 22	CH85 23	CH85 24	CH85 25	CH85 26	CH85 27	CH85 28	CH85 29	CH85 30	CH85 31
	Major element (oxide wt %)
	SiO2		50.72	51.29	54.52	49.73	50.4	49.43	49.5	50.95	48.68	49.54	46.87	50.52	49.69	48.91	48.43	48.84	49.03	49.08	49.96	49.24	48.16	49.09	48.54	48.88	49.57	49.31	48.83	48.96	49.77	50.93	49.6
	TiO2		1.25	1.19	0.95	3.07	2.03	2.02	2.96	2.01	2.6	1.8	1.39	1.78	2.52	3.49	2.73	2.39	3.18	2.34	1.8	1.94	2.59	2.18	2.28	2.57	2.4	2.94	3.34	2.31	2.27	2.1	2.6
	Al2O3		16.02	14.33	14.27	12.74	14.06	13.17	12.91	13.76	13	13.75	10.79	14.39	12.44	12.56	13.2	13.7	12.92	13.96	14.76	14.17	13.36	14.02	13.66	15.2	15.2	13.56	13.06	13.97	13.77	13.26	13.66
	Fe2O3		11.82	12.3	10.55	16.34	13.29	14.59	15.96	14.43	16	14.38	15.09	12.4	16.9	16.6	16.34	15.03	15.44	14.68	13.52	13.58	15.7	13.38	15.39	14.06	13	14.35	16.23	13.3	13.23	12.73	15.09
	Fe*
	MgO		6.57	7.83	6.46	5.37	6.02	6.43	5.46	5.66	5.82	7.05	12.01	7.15	5.13	5.4	5.88	6.42	5.79	6.03	5.88	6.71	6.14	6.77	6.67	6.26	5.79	5.5	5.12	7.8	7.39	7.32	5.55
	CaO		10.34	9.74	10.12	9.36	11.13	10.89	9.83	10.06	9.79	10.84	11.32	10.76	9.97	9.62	10.27	10.59	10.4	11.02	11.33	11.61	10.76	11.72	10.6	9.24	11.02	10.18	10.03	10.27	10.25	10.61	10.16
	Na2O		2.17	2.31	2.51	2.36	2.52	2.36	2.47	2.41	3.16	2.04	1.71	2.36	2.67	2.58	2.41	2.4	2.47	2.29	2.28	2.2	2.73	2.23	2.31	2.89	2.4	3.3	2.48	2.51	2.47	2.22	2.48
	K2O		0.76	0.72	0.32	0.52	0.14	0.18	0.38	0.34	0.51	0.22	0.45	0.28	0.25	0.29	0.25	0.22	0.27	0.17	0.11	0.2	0.12	0.24	0.14	0.36	0.2	0.37	0.3	0.44	0.46	0.44	0.36
	P2O5		0.11	0.12	0.1	0.27	0.13	0.17	0.27	0.18	0.22	0.17	0.13	0.16	0.2	0.3	0.23	0.21	0.28	0.22	0.15	0.16	0.23	0.18	0.19	0.28	0.22	0.28	0.31	0.21	0.22	0.2	0.25
	MnO		0.15	0.15	0.18	0.23	0.22	0.21	0.24	0.2	0.19	0.18	0.19	0.19	0.22	0.24	0.25	0.19	0.22	0.2	0.2	0.19	0.22	0.19	0.21	0.22	0.18	0.21	0.24	0.18	0.17	0.16	0.24
	FeO (if given)
	LOI (if given)
	TOTAL (if given)
	Trace Element (in ppm)
	Ba		90	184	125	154	87	86	140	161	122	123	143	142	119	116	95	83	111	83	80	90	77	64	79	105	104	136	135	167	174	207	160
	CO
	Cr
	Cu		122	99	107	268	216	191	266	195	212	114	96	152	207	299	196	218	269	185	177	180	258	164	210	184	225	260	290	159	159	133	231
	Li
	Nb		5	5	5	14	8	7	13	9	12	10	5	9	11	19	14	10	16	11	8	7	10	7	9	15	13	19	22	15	15	17	19
	Ni		111	189	80	56	54	59	60	51	83	117	308	103	35	63	64	86	69	68	62	82	75	96	92	106	81	68	48	174	148	143	73
	Sc
	Sr		184	161	160	220	230	238	231	217	227	212	155	212	214	229	240	215	243	235	210	214	214	234	208	276	234	240	250	264	286	305	281
	Rb		17	27	7	11		1	8	11	14	12	8	11	11	7	6	2	3	1	1	3	2	5	2	6	6	9	11	10	8	6	4
	V
	Y		29	27	23	46	34	34	45	35	40	31	28	32	42	52	35	38	45	36	30	30	31	31	35	30	35	41	45	29	31	28	34
	Zn		73	73	66	112	90	88	115	91	116	82	94	78	112	126	112	108	124	102	87	90	110	92	102	96	98	113	114	117	96	111	111
	Zr		101	92	85	202	114	117	193	134	160	116	89	125	159	199	142	130	184	135	102	113	125	114	124	125	143	174	205	135	134	139	156
	Ce
	Dy
	Sm		4.15	3.79	3.42	7.75				5.67		4.99	0.94	4.83	6.55	7.41	5.74	5.36	7.33	5.43	4.22			4.65			5.17	6.38			2.85	5.03
	Nd		18.6	15.8	14	27.9				20.9		18.1	14.9	19	24.4	27.8	20.9	18.8	26.7	19.1	15			16.2			20.4	24.1			11.87	22.45
	Computed Ratios:
	Ba\Zr		0.891089	2	1.47059	0.762376	0.763158	0.735043	0.725389	1.20149	0.7625	1.06034	1.60674	1.136	0.748428	0.582915	0.669014	0.638462	0.603261	0.614815	0.784314	0.79646	0.616	0.561404	0.637097	0.84	0.727273	0.781609	0.658537	1.23704	1.29851	1.48921	1.02564
	Ba\Sr
	Ba\Y		3.10345	6.81481	5.43478	3.34783	2.55882	2.52941	3.11111	4.6	3.05	3.96774	5.10714	4.4375	2.83333	2.23077	2.71429	2.18421	2.46667	2.30556	2.66667	3	2.48387	2.06452	2.25714	3.5	2.97143	3.31707	3	5.75862	5.6129	7.39286	4.70588
	Nb\Zr		0.049505	0.0543478	0.0588235	0.0693069	0.0701754	0.0598291	0.0673575	0.0671642	0.075	0.0862069	0.0561798	0.072	0.0691824	0.0954774	0.0985915	0.0769231	0.0869565	0.0814815	0.0784314	0.0619469	0.08	0.0614035	0.0725806	0.12	0.0909091	0.109195	0.107317	0.111111	0.11194	0.122302	0.121795
	TiO2\P2O5
	MgO\Ti
	Mg Number		56.4	43.4	58.8	43.4	51.4	50.7	44.4	47.8	45.9	53.3	65	57.3	41.4	43.1	45.6	49.9	46.6	48.9	50.3	53.3	47.7	54.1	50.3	50.9	50.9	47.2	42.4	57.8	56.6	57.3	46.2
	Ba*100
	Sr*100
	Zr*100
	143Nd/144Nd		0.51195±1-13.0	0.51194±1-13.3	0.51186±2-14.9	0.51267±1 0.80				0.51252±1-2.29-2.29		0.51256±1-1.33	0.51233±1-5.83	0.51237±2-4.90	0.51268±1 1.12	0.518284±24.21	0.51300±27.19	0.51287±24.65	0.51284±14.09	0.51282±13.70	0.51274±22.16			0.51288±14.87			0.51265±10.43	0.51274±12.22	0.51264±2		0.51252±1-1.99	0.51233±2-5.62
	87Sr/86Sr		0.71536	0.70598	0.71586	0.70598	0.70579	0.70577	0.70573	0.70761	0.70528	0.70682	0.70856	0.70814	0.70594	0.70396	0.70415	0.70432	0.70401	0.70427	0.70558			0.7039			0.70504	0.70427	0.70483		0.07049	0.70535

## Sheet: Beane et al_1986
	Full Citation		Beane, J.E., Turner, C.A., Hooper, P.R., Subbarao, K.V., and Walsh, J.N., 1986, Stratigraphy, composition and form of the Deccan basalts, Western Ghats, India: Bulletin of Volcanolgy, v. 48, p. 61 -83.
	Location of the sampling		Western DT
	Analysis done at		-
	Variation diagrams plotted		Fig. 5: Chemical composition vs stratigraphic height for a composite section
			Fig. 6: 87Sr/86Sr vs stratigraphic position
			Fig. 7: Ba/TiO2 vs stratigraphic height for the Mahabaleshwar and Sinhgad (pune) section.
			Fig. 9: 87Sr/86Sr vs Mg' (= Mg/(Mg + FE2))
			Fig. 8: MgO vs TiO2 wt% for eight formations
	Formation Name assigned by authors		Jawhar	Igatpuri	Igatpuri	Igatpuri	Igatpuri	Igatpuri	Neral	Nreal	Nreal	Nreal	Thakurwadi	Thakurwadi	Thakurwadi	Thakurwadi	Thakurwadi	Thakurwadi	Thakurwadi	Thakurwadi	Thakurwadi	Thakurwadi	Thakurwadi	Thakurwadi	Thakurwadi	Bhimashankar	Bhimashankar	Bhimashankar	Khandala	Khandala	Khandala	Khandala	Khandala	Khandala	Khandala	Khandala	Khandala	Khandala	Khandala	Khandala	Bushe	Bushe	Bushe	Bushe	Bushe	Poladpur	Poladpur	Poladpur	Ambenali
	Chemical Types assigned by authors		Kasara Phyric	Thal GPB	Igat. Mafic	Igat.Phyric	Igat. Mafic	Kashele GPB	Ambivli picrite basalt	Tembre aphyric	Nreal CT	Nreal CT	Jammu#2	Jammu#3	Khopoli picrite basalt	Thak. CT	Thak. CT	water pipe					waterpipe picrite basalt	waterpipe picrite basalt	waterpipe picrite basalt	Manchar GPB	Bhim CT	Bhim CT	Giravali GPB	Monkey hill GPB	Khandala coarse	Dhak Dongar	KAF - 1	KAF-2	Boyhare	KAF-3	Khandala phyric				Bushe picrite	Bushe CT	Bushe CT	Shingi hill	Pingalvadi	Ambavne	Poladpur	poladpur
	Sample No (as in paper)		IGA002	IGA009	IGA012	SAM004	SAM011	SAM012	TEM003	EB339	JEB003	BOR027	JEB012	JEB013	BOR036	BOR041	JEB315	BOR01	JEB023	JEB024	JEB027	JEB028	JEB021	JEB022	JEB248	JEB351	JEB419	BIM025	JEB128B	KOP021	KOP023	BOR004	KOP026	JEB346	JEB431	EB132	KOP028	KOP022	BOR002	BOR003	JEBl16	BSH002	BSH007	JEB211	JEB353	BSH008	SAS003	CAT008	CAT012
	Altitude of Sample (if given)
	Altitude of Sample (as can be inferred)
	Sr no of analysis in paper		1	2	3	4	5	6	7	8	9	10	11	12	13	14	15	16	17	18	19	20	21	22	23	24	25	26	27	28	29	30	31	32	33	34	35	36	37	38	39	40	41	42	43	44	45	46	47
	Sr no in Data base		BE86 01	BE86 02	BE86 03	BE86 04	BE86 05	BE86 06	BE86 07	BE86 08	BE86 09	BE86 10	BE86 11	BE86 12	BE86 13	BE86 14	BE86 15	BE86 16	BE86 17	BE86 18	BE86 19	BE86 20	BE86 21	BE86 22	BE86 23	BE86 24	BE86 25	BE86 26	BE86 27	BE86 28	BE86 29	BE86 30	BE86 31	BE86 32	BE86 33	BE86 34	BE86 35	BE86 36	BE86 37	BE86 38	BE86 39	BE86 40	BE86 41	BE86 42	BE86 43	BE86 44	BE86 45	BE86 46	BE86 47
	Major element (oxide wt %)
	SiO2		51.77	50.63	50.77	49.34	49.88	49.56	50.28	50.32	50.97	50.37	52.16	52.58	49.76	51.33	51.14	52.75	50.57	51.87	50.1	51.49	53.32	52	52.95	51.14	50.86	49.73	50.21	50.6	48.5	51.24	49.16	52.39	51.25	51.39	52.22	48.14	47.43	48.59	49.85	53.33	52.59	54.22	52.16	51.66	50.63	49.81	49.52
	TiO2		2.79	3.58	2.08	2.07	1.63	2.94	1.46	2.95	1.39	1.58	2.13	2.56	1.64	1.82	1.83	1.14	1.88	1.79	1.92	1.84	1.34	1.1	0.99	2.87	2.48	2.26	2.91	3.21	1.56	2.99	1.08	1.19	1.21	1.71	2.42	1.44	1.38	1.46	1.13	1.1	1.08	1.3	1.14	2.21	1.8	2.48	2.29
	Al2O3		13.47	13.33	15.27	15.4	12.8	14.05	12.39	12.85	13.36	12.64	13.57	13.4	12.1	13.73	12.95	11.73	13.71	12.85	13.38	12.49	13.52	10.29	8.32	12.95	13.23	14.81	13.36	13.42	17.62	13.2	15.07	13.86	12.64	15.59	13.56	16.88	18.9	17.38	11.63	15.83	15.63	15.25	13.88	14.22	14.79	13.5	14.09
	Fe*		14.01	14.42	11.75	12.7	11.63	15	11.58	14.96	10.92	11.61	12.64	15.1	12.16	11.26	12.16	10.7					10.94	10.77	10.78	14.46	13.44	12.85	13.81	14.01	12.27	14.29	11.54	10.92	11.59	12.29	13.91				11.59	10.06	10.64	10.47	10.94	13.49	11.33	14.96	13.86
	Fe2O3
	MgO		4.59	4.41	5.95	5.66	8.82	4.57	10.35	5.4	8.81	9.63	5.89	3.51	11.86	7.68	7.72	10.26	8.05	7.9	8.06	8.02	7.59	11.41	12.75	5.11	5.95	6.02	5.87	4.97	5.77	5.02	8.78	7.68	9.68	5.93	4.72	6.6	4.8	6.05	12.03	5.92	6.8	5	8.07	5.22	6.29	5.11	6.35
	CaO		8.6	8.36	9.8	10.39	11.51	9.02	10.43	9.1	10.84	10.95	9.71	7.47	9.99	10.85	11.04	10.46	10.37	9.92	10.91	10.22	10.05	11.32	12.34	10.1	10.02	10.01	9.29	8.66	10.74	9.15	10.65	9.77	10.63	9.31	9.04	10.41	11.74	9.95	10.82	9.65	10.34	9.63	10.61	9.34	11.41	9.89	10.38
	Na2O		3.31	3.3	3.3	3.19	2.62	3.4	2.69	2.9	2.9	2.63	2.46	3.23	1.74	2.33	2.31	2.02	2.56	3	2.83	2.97	2.13	1.78	1.61	3.23	3.01	3.29	3.25	3.44	2.89	3.03	2.84	2.76	2.24	2.61	2.64	3.08	2.68	2.68	2.28	2.97	2.35	2.65	2.45	2.86	3.25	3.41	2.91
	K2O		0.98	1.38	0.69	0.84	0.76	0.92	0.49	0.99	0.43	0.2	1	1.63	0.41	0.62	0.49	0.63	0.23	0.21	0.14	0.29	0.78	0.49	0.46	0.3	0.57	0.61	0.79	1.1	0.28	0.54	0.56	1.08	0.44	0.76	1.03	0.22	0.2	0.94	0.4	0.85	0.28	1.13	0.49	0.57	0.13	0.39	0.17
	P2O5		0.31	0.4	0.23	0.24	0.18	0.35	0.17	0.34	0.23	0.21	0.26	0.36	0.16	0.2	0.19	0.14	0.21	0.21	0.22	0.21	0.16	0.13	0.13	0.3	0.26	0.24	0.32	0.4	0.17	0.34	0.15	0.19	0.16	0.25	0.27	0.17	0.16	0.16	0.11	0.13	0.12	0.18	0.09	0.24	0.19	0.25	0.24
	MnO		0.17	0.19	0.16	0.16	0.17	0.2	0.16	0.19	0.15	0.18	0.18	0.16	0.18	0.18	0.17	0.16	0.17	0.16	0.19	0.16	0.17	0.17	0.17	0.2	0.18	0.17	0.19	0.19	0.2	0.2	0.17	0.16	0.16	0.16	0.19	0.17	0.16	0.18	0.16	0.16	0.17	0.17	0.17	0.19	0.17	0.21	0.2
	FeO (if given)																		12.25	12.08	12.25	12.31									12.27							12.89	12.55	12.61
	LOI (if given)
	TOTAL (if given)
	Trace Element (in ppm)
	Ba		224	269	171	185	158	249	100	224	163	116	264	415	93	118	115	176	76	103	74	123	154	116	126	140	122	106	211	304	159	243	138	488	323	513	238	173	134	231	93	145	116	285	81	184	58	119	46
	CO
	Cr		59	71	96	147	286	81	494	109	392	496	94	45	488	325	273	633	337	350	413	347	323	669	1076	105	141	179	117	110	80	96	335	270	298	93	67	77	74	88	440	128	223	115	325	115	212	63	124
	Cu		148	177	75	98	46	144	84	201	86	85	112	114	134	167	140	124	150	128	156	127	114	93	85	194	227	166	241	366	156	242	101	73	85	124	124	142	146	142	96	87	134	54	131	200	151	224	218
	Li
	Nb
	Ni		55	63	77	121	82	57	147	103	121	130	64	46	376	140	135	252	196	176	189	180	190	265	266	97	104	112	108	84	120	84	195	154	227	120	72	154	163	139	290	70	114	64	169	81	112	67	112
	Sc		31	27	31	31	29	28	30	31	35	35	32	31	34	37	33	38	30	30	32	31	31	34	41	31	34	34	33	33	33	37	33	30	31	29	35	31	35	34	29	29	32	28	34	33	35	39	37
	Sr		252	249	236	231	207	272	180	258	311	279	302	285	192	264	236	291	234	257	238	262	299	229	164	277	251	257	254	263	196	278	174	267	260	322	266	206	235	221	132	160	175	232	123	241	215	201	209
	Rb								26				24				16									9								30	9	13	33				7	33	13	30	13	16
	V		384	352	333	335	271	323	276	354	275	292	336	358	278	330	310	310	294	274	303	285	265	277	293	368	361	332	372	386	259	420	224	245	261	284	382	251	270	261	253	239	248	250	273	356	337	440	402
	Y		43	48	36	34	24	39	23	43	23	25	34	46	23	29	27	21	26	26	27	26	19	22	16	39	41	33	40	52	31	52	24	31	25	33	43	30	32	33	23	27	27	31	27	40	29	43	34
	Zn		128	132	109	108	86	122	88	136	96	97	106	136	101	108	100	102	101	99	104	100	93	88		126	123	115		143	111	143	89	93	92		126	117	117	120		88	87		87	119	107	137	124
	Zr		197	251	157	123	101	195	86	186	93	106	148	222	90	116	103	98	114	124	124	124	97	81	59	168	142	135	191	255	99	241	67	121	94	144	180	97	104	108	74	93	89	121	78	166	107	157	122
	Ce
	Dy
	Sm
	Nd
	Computed Ratios:
	Ba\Zr
	Ba\Sr		0.89	1.08	0.72	0.8	0.76	0.92	0.56	0.87	0.52	0.42	0.87	1.46	0.48	0.45	0.49	0.6								0.51	0.49	0.41	0.83	1.16	0.81	0.87	0.79	1.83	1.24	1.59	0.89				0.7	0.91	0.66	1.23	0.66	0.76	0.27	0.59	0.22
	Ba\Y
	Zr\Nb
	TiO2\P2O5
	MgO\Ti
	Mg Number		40	39	51	48	61	39	65	43	63	63	49	33	67	59	57	67								44	48	49	47	42	49	42	61	59	63	50	39				68	55	57	50	60	45	__	__	49
	Ba*100		1.34	1.25	1.37	1.49	1.62	1.41	1.14	1.27	1.96	1.22	2.07	2.7	0.95	1.08	1.05	2.58								0.81	0.82	0.78	1.21	1.58	1.7	1.36	2.13	6.84	4.45	5	1.64				1.37	2.2	1.79	3.66	1.19	1.39	0.53	0.8	0.34
	Sr*100		1.51	1.16	1.89	1.86	2.12	1.54	2.06	1.46	3.73	2.95	2.37	1.86	1.95	2.42	2.15	4.26								1.61	1.69	1.9	1.46	1.37	2.1	1.55	2.69	3.74	3.58	3.14	1.83				1.95	2.43	2.7	2.98	1.8	1.82	1.98	1.35	1.52
	Zr*100		1.18	1.17	1.26	0.99	1.03	1.11	0.98	1.05	1.12	1.12	1.16	1.45	0.92	1.06	0.94	1.43								0.98	0.96	1	1.09	1.33	1.06	1.34	1.03	1.7	1.3	1.4	1.24				1.09	1.41	1.37	1.55	1.14	1.25	0.99	1.06	0.89
	143Nd/144Nd
	87Sr/86Sr
[truncated: 2 more columns]

## Sheet: Mitchell and Cox_1988
	Full Citation		Mitchell, C., and Cox, K.G., 1988, A geochemical sketch map of the southern part of the Deccan Province, Geol. Soc. India, Memoir 10, pp. 27-33
	Location of the sampling		Southern Deccan Province
	Analysis done at
	Variation diagrams plotted
0	Formation Name assigned by authors		Ambenali	Ambenali	Ambenali	Ambenali	Ambenali	Poladpur	Poladpur	Mahabaleshwar
	Chemical Types assigned by authors
	Sample No (as in paper)		B3	B13	H1	H12	H23	B9	G11	D11
	Altitude of Sample (if given)
	Altitude of Sample (as can be inferred)
	Sr no of analysis in paper		1	2	3	4	5	6	7	8
	Sr no in Data base		MC88 01	MC88 02	MC88 03	MC88 04	MC88 05	MC88 06	MC88 07	MC88 08
	Major element (oxide wt %)
	SiO2		48.87	48.62	48.49	48.75	48.28	49.53	50.28	49.08
	TiO2		2.35	2.25	2.33	2.38	2.64	2.6	3.08	3.32
	Al2O3		13.69	13.88	13.63	13.84	13.8	13.6	13.41	13.24
	Fe2O3		14.99	15.14	15.58	14.8	15.81	15.88	15.8	16.33
	Fe*
	MgO		6.46	6.39	6.23	6.18	5.95	5.27	4.65	5.57
	CaO		11.14	10.85	10.31	10.36	10.25	10.04	9.51	9.59
	Na2O		2.26	2.25	2.26	2.44	2.47	2.42	2.59	2.53
	K2O		0.17	0.3	0.35	0.33	0.2	0.25	0.81	0.74
	P2O5		0.21	0.2	0.21	0.22	0.24	0.23	0.33	0.33
	MnO		0.2	0.21	0.22	0.2	0.23	0.21	0.21	0.21
	FeO (if given)
	LOI (if given)
	TOTAL (if given)		99.84	100.09	99.61	99.5	99.87	100.03	100.67	99.94
	Trace Element (in ppm)
	Ba		71	80	84	92	118	139	269	218
	CO
	Cr
	Cu
	Li
	Nb		9	8	8	9	10	11	14	23
	Ni
	Sc
	Sr		219	223	207	229	236	270	274	320
	Rb		9	11	13	10	9	13	32	25
	V
	Y		33	33	34	33	38	36	44	38
	Zn
	Zr		141	130	136	142	159	165	232	212
	Ce
	Dy
	Sm
	Nd
	Computed Ratios:
	Ba\Zr
	Ba\Sr
	Ba\Y		2.1	2.4	2.5	2.8	3.1	3.9	6.1	5.7
	Zr\Nb		16	16	17	16	16	15	17	9
	TiO2\P2O5
	MgO\Ti
	Mg Number
	Ba*100
	Sr*100
	Zr*100
	143Nd/144Nd
	87Sr/86Sr		0.7041	0.7046	0.7045	0.7046	0.7045	0.7061	0.7073	0.7049

## Sheet: Beane and Hooper_1988
	Full Citation		Beane J.E. and Hooper, P.R., 1988 A note on the Picrite Basalts of the Western Ghats, Deccan Traps, India, Memoir Geol.Soc. India., v. 10, pp. 117-133
	Location of the sampling		Western DT
	Analysis done at
	Variation diagrams plotted		Fig. 3: Major oxides plotted agaisnt %MgO for water pipe flow and high TiO2 Thakurwadi flows.
			Fig. 4: selected trace elements plotted against %MgO for the water pipe flow and high TiO2 Thakurwadi flows.
	Formation Name assigned by authors		Thakurwadi	Thakurwadi	Thakurwadi	Thakurwadi	Thakurwadi	Thakurwadi	Thakurwadi	Thakurwadi	Thakurwadi	Thakurwadi	Thakurwadi	Thakurwadi	Thakurwadi	Thakurwadi	Thakurwadi	Thakurwadi	Thakurwadi	Thakurwadi	Thakurwadi	Thakurwadi	Thakurwadi	Thakurwadi
	Chemical Types assigned by authors		water pipe member	water pipe member	water pipe member	water pipe member	water pipe member	water pipe member	water pipe member	water pipe member	water pipe member	water pipe member	water pipe member	water pipe member	water pipe member	water pipe member	water pipe member	water pipe member	High TiO2 Thakurwadi basalts	High TiO2 Thakurwadi basalts	High TiO2 Thakurwadi basalts	High TiO2 Thakurwadi basalts	High TiO2 Thakurwadi basalts	High TiO2 Thakurwadi basalts
	Sample No (as in paper)		BORO15	BORO16	BORO17	BORO18	BORO19	JEB021	JEB022	JEB159	JEB171	JEB174	JEB248	JEB290	JEB291	JEB318	JEB472	KOP008	SAM016	SAM018	SAM017	JEB015	JEB326	JEB246
	Altitude of Sample (if given)
	Altitude of Sample (as can be inferred)
	Sr no of analysis in paper		1	2	3	4	5	6	7	8	9	10	11	12	13	14	15	16	17	18	19	20	21	22
	Sr no in Data base		BH88 01	BH88 02	BH88 03	BH88 04	BH88 05	BH88 06	BH88 07	BH88 08	BH88 09	BH88 10	BH88 11	BH88 12	BH88 13	BH88 14	BH88 15	BH88 16	BH88 17	BH88 18	BH88 19	BH88 20	BH88 21	BH88 22
	Major element (oxide wt %)
	SiO2		52.85	53.24	51	51.81	52.51	53.2	52.31	52.06	53.1	52.69	52.64	52.46	52.64	52.28	52.82	53.08	49.81	49.04	48.24	49.93	49.74	50.03
	TiO2		1.17	1.54	1.52	1.42	1.6	1.34	1.12	1.41	1.44	1.19	1.01	1.09	1	1.12	1.02	1.2	2.52	2.32	1.68	2.07	2.1	2.01
	Al2O3		11.44	14.48	14.51	12.98	13.58	13.42	10.14	10.97	12.48	9.2	8.13	8.23	8.04	8.92	7.95	10.34	14.75	15.05	10.01	12.75	12.26	12.55
	Fe2O3
	Fe*
	MgO		10.2	6.9	8.23	9.05	7.26	7.78	11.59	9.61	9.02	11.6	13.01	12.66	12.74	11.82	13.06	10.59	6.44	6.89	15.63	9.77	10.71	10.8
	CaO		10.85	10.04	10.56	10.35	10.36	10.24	11.44	11.08	9.82	12.17	12.52	12.7	13.05	12.55	12.5	11.36	10.49	10.92	7.06	9.2	9.09	8.91
	Na2O		1.87	2.06	2.03	1.96	2.04	2.06	1.71	2.09	1.88	1.73	1.63	1.55	1.71	1.81	1.64	1.87	1.99	1.9	1.22	2.25	1.91	1.98
	K2O		0.57	0.55	0.65	0.71	0.94	0.76	0.48	0.78	0.67	0.5	0.45	0.43	0.45	0.55	0.45	0.59	0.84	0.4	0.55	0.79	0.75	0.75
	P2O5		0.14	0.17	0.17	0.16	0.2	0.15	0.13	0.16	0.16	0.13	0.11	0.12	0.11	0.13	0.12	0.13	0.29	0.26	0.16	0.26	0.26	0.26
	MnO		0.17	0.18	0.16	0.18	0.19	0.17	0.17	0.17	0.17	0.18	0.18	0.18	0.18	0.18	0.18	0.17	0.19	0.19	0.21	0.18	0.17	0.17
	Fe**		10.75	10.84	11.17	11.37	11.31	10.9	10.92	11.67	11.26	10.61	10.32	10.57	10.08	10.66	10.26	10.66	12.68	13.02	15.23	12.8	13	12.55
	LOI (if given)
	TOTAL (if given)
	Trace Element (in ppm)
	Ba		184	251	188	204	235	187	121	196	189	125	94	125	125	187	130	171	210	150	143	219	205	204
	CO		53	39	44	47	42	46	51	47	48	49	47	46	45	49	47	47	32	33	74	48	52	51
	Cr		847	178	200	430	219	384	1044	741	264	1263	1631	1747	1503	1334	1547	1052	177	195	621	454	437	549
	Cu
	Li
	Nb
	Ni		252	110	151	199	141	190	265	211	193	240	266	271	247	235	263	226	81	83	519	332	356	350
	Sc		36	33	33	34	32	33	38	36	28	40	43	41	41	40	43	40	31	31	25	28	26	26
	Sr		254	404	331	300	328	312	229	269	288	209	173	188	191	213	187	237	248	264	182	276	254	250
	Rb
	V		277	287	262	267	289	265	277	295	274	311	292	302	299	298	299	292	308	308	247	265	284	281
	Y		19	24	23	19	26	20	19	21	21	19.5	16	17	17	17.5	18	19	33	31	23	30	31	30
	Zn
	Zr		93	123	118	124	136	114	84	118	102	90	71	77	76	80	73	103	151	140	112	141	143	136
	Ce
	Dy
	Sm
	Nd
	Computed Ratios:
	Ba\Zr
	Ba\Sr
	Ba\Y
	Zr\Nb
	TiO2\P2O5
	MgO\Ti
	Mg Number
	Ba*100
	Sr*100
	Zr*100
	143Nd/144Nd
	87Sr/86Sr

## Sheet: Bodas et al_1988
	Full Citation		Bodas, M.S., Khadri S.R.F., and Subbarao, K.V. (1988) Stratigraphy of the Jawhar and Igatpuri Formations, Western Ghat Lava pile. Memoir Geol. Soc. India., v. 10, pp. 235-252
	Location of the sampling		Western DT
	Analysis done at
	Variation diagrams plotted		Fig3. Chemical variation vs height in Trimbak Ghat section
			Fig. 4: Chemical variation vs height in Chondi Khurd Traverse
			Fig. 5: Chemical variation vs height inKothala Traverse
			Fig. 6: Chemical variation vs height in Malshej Ghat section
	Formation Name assigned by authors		Jawhar	Jawhar	Jawhar	Jawhar	Jawhar	Jawhar	Jawhar	Jawhar	Jawhar	Jawhar	Jawhar	Jawhar	Jawhar	Jawhar	Jawhar	Jawhar	Jawhar	Jawhar	Jawhar	Jawhar	Jawhar	Poladpur	Jawhar	Jawhar	Igatpuri	Igatpuri	Igatpuri	Igatpuri	Igatpuri	Igatpuri	Igatpuri	Igatpuri	Igatpuri	Igatpuri	Igatpuri
	Chemical Types assigned by authors		JW CT 1	JW CT 1	JW CT 1	JW CT 1	JW CT 1	JW CT 1	JW CT 1	JW CT 1	JW CT 2	JW CT 2	JW CT 2	JW CT 2	JW CT 2	JW CT3	JW CT3	JW CT3	JW CT3	JW CT3	JW CT3	JW CT3	JW CT3	Poladpur	JW CT3	JW CT3	IG CT 1	IG CT 1	IG CT 1	IG CT 1	IG CT 1	IG CT 2	IG CT 2	IG CT 2	IG CT 2	IG CT 2	IG CT 2
	Sample No (as in paper)		TRM 1	IGO 30	IGA 5	JW 51	KK 14	GS 87	GS 88	GS 89	SAM 4	DH 44	JH 59	JW 40	JW 45	IGA 8	GS 77	TRM 5	SAM 1	IGO 28	IG 26	IGO 231	IGO 26	IGA 3	IGO 25	GS 86	KK 2	SAM 5	TRM 11	GS 102	GS 103	TRM 9	GS 144	GS 145	IG 105	JH 8	TRM 10
	Altitude of Sample (if given)
	Altitude of Sample (as can be inferred)
	Sr no of analysis in paper		1	2	3	4	5	6	7	8	9	10	11	12	13	14	15	16	17	18	19	20	21	22	23	24	25	26	27	28	29	30	31	32	33	34	35
	Sr no in Data base		BO88 01	BO88 02	BO88 03	BO88 04	BO88 05	BO88 06	BO88 07	BO88 08	BO88 09	BO88 10	BO88 11	BO88 12	BO88 13	BO88 14	BO88 15	BO88 16	BO88 17	BO88 18	BO88 19	BO88 20	BO88 21	BO88 22	BO88 23	BO88 24	BO88 25	BO88 26	BO88 27	BO88 28	BO88 29	BO88 30	BO88 31	BO88 32	BO88 33	BO88 34	BO88 35
	Major element (oxide wt %)
	SiO2		52.92	50.76	51.46	52.87	53.26	52.81	51.71	51.53	49.34	52.79	50.24	50.58	50.67	50.71	51.01	52.24	50.4	51.03	51.26	50.87	51.87	50.53	52.28	51.84	51.82	50.24	51.3	51.14	50.13	51.04	52.1	50.12	51.14	51.9	51.56
	TiO2		1.61	1.56	1.59	1.56	1.58	1.74	1.45	1.47	2.07	1.91	2.25	2.3	2	2.82	2.83	3.06	2.9	2.96	2.87	2.85	2.95	2.98	2.84	2.44	1.43	1.97	1.79	1.63	1.66	2.29	2.22	2.15	2.24	2.31	2.18
	Al2O3		13.7	13.53	13.82	13.25	13.55	13.76	14.6	14.58	15.4	14.31	15.83	15.26	14.57	13.24	13.27	14.49	13.44	13.21	14.09	12.54	13.19	13.62	12.39	14.35	15.09	15.27	14.28	12.27	12.3	14.74	14.29	14.99	14.49	14.07	14.18
	Fe2O3		5.14	5.45	5.33	5.32	5.12	5.34	5.23	5.31	5.92	5.23	5.69	5.96	5.83	6.96	7	6.3	6.86	6.91	6.64	6.9	6.61	6.72	6.71	5.91	5.61	5.58	5.78	5.45	5.56	5.79	5.57	6.01	6.03	5.9	5.77
	Fe*
	MgO		6.9	8.36	7.63	7.12	7.01	7.26	7	7.18	5.66	5.66	5.59	5.01	6.01	4.51	4.78	3.96	4.73	4.58	4.09	5.03	4.63	4.77	4.27	5.39	5.91	5.96	7.27	8.58	9.2	6.14	5.49	6	5.34	5.57	5.46
	CaO		9.7	10.5	10.78	9.74	10.45	10.2	10.98	10.85	10.39	10.28	10.26	9.59	10.22	8.89	9.1	7.62	9.18	8.97	8.83	8.34	8.91	8.96	8.73	9.17	10.45	10.37	10.24	11.57	11.59	10.07	9.8	10.26	9.9	9.84	10.52
	Na2O		2.52	2.54	2.8	2.59	2.29	2.16	2.31	2.23	3.19	2.49	2.49	2.94	2.96	3.5	2.68	3	3.31	2.95	3.06	2.51	2.69	3.18	2.71	2.46	2.03	3.18	1.93	1.96	2.02	2.24	2.77	2.43	2.73	2.25	2.08
	K2O		0.71	0.71	0.73	1.13	0.55	0.25	0.48	0.46	0.84	0.93	0.75	1.13	0.69	0.91	0.84	1.65	0.82	1.01	1.08	2.58	1.07	1.03	1.9	1.24	0.89	0.67	0.43	0.81	0.81	0.68	0.97	0.76	0.81	0.97	1.24
	P2O5		0.17	0.17	0.19	0.16	0.15	0.22	0.15	0.15	0.24	0.21	0.24	0.25	0.22	0.31	0.29	0.32	0.3	0.3	0.29	0.29	0.3	0.31	0.29	0.24	0.16	0.21	0.2	0.18	0.18	0.23	0.26	0.21	0.24	0.25	0.22
	MnO		0.17	0.17	0.17	0.15	0.18	0.14	0.166	0.16	0.16	0.19	0.15	0.15	0.15	0.19	0.2	0.14	0.21	0.19	0.18	0.2	0.2	0.19	0.2	0.17	0.18	0.16	0.16	0.16	0.16	0.16	0.15	0.18	0.14	0.18	0.19
	FeO (if given)		6.2	6.24	6.1	6.09	5.86	6.12	5.99	6.08	6.78	6	6.51	6.83	6.68	7.97	8.01	7.22	7.86	7.91	7.61	7.9	7.57	7.7	7.68	6.77	6.43	6.39	6.62	6.25	6.37	6.63	6.38	6.89	6.91	6.76	6.61
	LOI (if given)
	TOTAL (if given)
	Trace Element (in ppm)
	Ba		188	248	170	269	164	138	126	137	185	190	219	313	198	237	225	377	226	275	276	406	216	231	352	134	247	169	185	168	156	155	208	171	218	253	250
	CO		37	39	38	37	34	39	38	39	40	40	41	39	41	43	49	39	40	46	40	41	42	37	40	39	34	44	41	43	42	46	42	45	36	43	37
	Cr		224	334	292		269	220	207	290	147	183	230			77	109	102	70					59		102	121	120	240	312	314	240	137	141		88	225
	Cu		54	67	70	56	68	92	80	95	98	81	132	138	100	185	177	187	176	154	156	61	150	147	214	165	70	88	45			110	117	90	81	88	194
	Li
	Nb		9		10		9				11			12	10	16		21	17			17	19	19			12	11	10			18			11	14
	Ni		86	114	91	87	51	132	118	119	121	61	106	111	140	63	77	79	67	80	66	79	67	53	72	87		125	97	105	104	146	105	119	83	45	123
	Sc		34	34	34	30	31	30	34	28	31	30	25	27	28	36	35	26	34	31	29	31	30	31	28	29	33	31	30	34	30	31	26	26	28	31	26
	Sr		122	160	181	255	304	315	183	184	231	223	254	254	230	264	269	208	253	264	318	172	256	263	218	171	192	242	232	214	198	233	229	233	109	250	198
	Rb
	V		284	293	287	268	273	276	267	280	335	332	258	301	316	450	431	306	422	419	357	392	401	392	380	313	263	334	298	319	294	350	343	332	313	340	273
	Y		28	27		26	27	35	29	29	34	32	33	34	31		44	42	41	40	37	34	40		38	33	32	33	29	27	25	35	39	39	32	36	31
	Zn		86	99		92	72	109	110	95	108	87	98	107	102		147	118	139	145	128	131	127		169	118	83	108	94	100	95	113	102	103	98	102	94
	Zr		126	119	114	115	96	122	95	99	123	144	133	168	163	212	205	230	150	212	200	126	205	195	199	154	99	129	135	114	108	168	195	176	172	156	140
	Ce
	Dy
	Sm
	Nd
	Computed Ratios:
	Ba\Zr
	Ba\Sr
	Ba\Y
	Zr\Nb
	TiO2\P2O5
	MgO\Ti
	Mg Number
	Ba*100
	Sr*100
	Zr*100
	143Nd/144Nd
	87Sr/86Sr

## Sheet: Khadri et al_1988
	Full Citation		Khadri, S.R.F., Subbarao, K.V., Hooper, P.R., and Walsh, J.N. (1988) Stratigraphy of Thakurwadi Formation, Western Deccan Basalt Province, India, Memoir, Geol. Soc. India, v. 10, pp. 281 - 304
	Location of the sampling		Western DT
	Analysis done at		Washington State University
	Variation diagrams plotted		Fig. 4a: composite chemical variation diagram against altitude of Kalsubai section
			Fig. 4b: Composite chemical variation diagram against altitude for Harishchandragad section
			Fig. 5: variations of Zr vs MgO and Zr vs TiO2 contents in various chemical types from Thakurwadi Formation
			Fig. 6: Variation diagram showing Ba/Ti x 104 , Ba/Sr and Ba/Zr vs stratigraphic height for Kalsubai and Amboli section
			Fig. 7: TiO2 vs MgO and P2O5 diagram in various chemical types from the Thakurwadi Formation
			Fig. 7c: Ni vs Cr variation diagram for seperating THHICR, THLONI, THHINI and RGD chemical types
	Formation Name assigned by authors		Thakurwadi	Thakurwadi	Thakurwadi	Thakurwadi	Thakurwadi	Thakurwadi	Thakurwadi	Thakurwadi	Thakurwadi	Thakurwadi	Thakurwadi	Thakurwadi	Thakurwadi	Thakurwadi	Thakurwadi	Thakurwadi	Thakurwadi	Thakurwadi	Thakurwadi	Thakurwadi	Thakurwadi	Thakurwadi	Thakurwadi	Thakurwadi
	Chemical Types assigned by authors		Jammupatti	THHICR 1
	Sample No (as in paper)		GS159	IG41	IG14	IG40	GS34	GS41	GS48	GS60	GS10	GS11	BH63	GS57	GS16	GS27	GS61	GS19	GS25	GS45	MD14	GS54	JEB260	GS51	GS62	KB14
	Altitude of Sample (if given)			650m	655m	660m	800m	875m	953m	1195m	725m	730m		1115m	750m	825m	1215m	785m	825m	938m		1078m		1004m	1225m
	Altitude of Sample (as can be inferred)
	Sr no of analysis in paper		1	2	3	4	5	6	7	8	9	10	11	12	13	14	15	16	17	18	19	20	21	22	23	24
	Sr no in Data base		KH88 01	KH88 02	KH88 03	KH88 04	KH88 05	KH88 06	KH88 07	KH88 08	KH88 09	KH88 10	KH88 11	KH88 12	KH88 13	KH88 14	KH88 15	KH88 16	KH88 17	KH88 18	KH88 19	KH88 20	KH88 21	KH88 22	KH88 23	KH88 24
	Major element (oxide wt %)
	SiO2		52.32	52.05	54.2	51.64	53.2	50.61	50.38	51.05	52.84	50.01	47.82	52.42	51.09	52.35	51.32	50.78	50.62	51.19	50.34	50.97	51.25	50.03	50.71	49.02
	TiO2		1.94	2.17	2.79	1.62	1.62	1.77	1.89	1.79	1.73	1.46	1.34	1.29	1.8	1.83	2	2.59	2.33	2.56	1.82	1.84	1.75	2.05	2.11	3.3
	Al2O3		13.76	12.99	13.26	13.33	12.7	14.02	13.61	12.84	14.05	11.6	10.33	11.44	14.87	13.86	14.58	13.39	14.3	13.39	13.16	13.51	12.84	14.14	14.06	14.31
	Fe2O3		5.45	6.04	6.64	5.47	5.32	5.57	5.53	5.82	5.16	5.75	6.31	5.22	5.37	5.57	5.73	6.89	6.15	6.71	5.75	5.54	5.57	5.42	5.74	7.97
	Fe*
	MgO		6.55	6.52	3.96	8.13	8.48	8.23	7.85	8.05	6.72	13.11	15.43	9.85	6.82	6.71	6.26	5.55	6.36	5.4	9.21	7.76	8.22	8.2	6.81	5.24
	CaO		8.93	10.17	7.17	9.71	8.95	10.49	11.8	11.17	9.45	9.25	9.09	10.84	11.27	10.61	10.09	9.78	9.97	9.58	10.78	11.13	10.84	11.36	11	7.43
	Na2O		2.24	2.43	3.15	2.73	2.56	2.21	1.75	2.05	1.88	1.58	1.82	1.92	1.92	1.89	2.25	2.4	2.51	2.73	1.8	2.01	2.25	2.07	2.33	2.11
	K2O		1.18	0.32	0.78	0.74	0.66	0.32	0.43	0.21	1.87	0.29	0.3	0.71	0.32	0.43	0.83	0.27	0.28	0.32	0.15	0.48	0.5	0.16	0.28	0.96
	P2O5		0.23	0.21	0.3	0.21	0.23	0.22	0.22	0.2	0.2	0.18	0.15	0.15	0.21	0.21	0.23	0.25	0.26	0.24	0.21	0.2	0.22	0.2	0.21	0.32
	MnO		0.15	0.15	0.17	0.16	0.18	0.17	0.17	0.18	0.18	0.18	0.18	0.17	0.16	0.17	0.17	0.2	0.18	0.2	0.18	0.2	0.18	0.17	0.18	0.21
	FeO (if given)		6.24	6.92	7.6	6.26	6.1	6.38	6.33	6.66	5.91	6.58	7.23	5.98	6.15	6.37	6.56	7.89	7.04	7.6	6.59	6.35	6.38	6.2	6.57	9.13
	LOI (if given)
	TOTAL (if given)
	Trace Element (in ppm)
	Ba		232	172	262	238	211	136	124	107	173	143	107	171	94	119	171	115	119	110	99	111	137	63	90	163
	CO		40	41	37	40	44	45	47	47	39	52	58	45	40	40	43	49	47	53	48	46	41	49	43	43
	Cr		234			404	302	286	260	391	285	553	821	495	221	195	203	105	200	123	419	344	321	408	233	125
	Cu		75	132	128	70	92	136	157	114	137	108	116	85	137	140	129	223	214	223	156	141	155	179	173	219
	Li
	Nb
	Ni		156	113	65	141	150	138	115	164	143	448	484	197	104	104	104	90	130	95	243	217	202	192	139	86
	Sc		27	32	28	30	32	34	36	34	34	27	25	35	32	32	31	28	36	36	35	33	30	37	34	36
	Sr		251	236	486	238	216	289	317	265	130	187	169	233	207	424	289	236	267	250	226	250	259	243	240
	Rb
	V		284	312	330	278	268	306	323	319	310	228	219	293	282	279	320	408	374	425	309	314	293	352	319	342
	Y		37	34	41	25	28	32	27	26	28	22	17	21	28	28	30	40	39	41	27	32	25	35	30	61
	Zn		105	107	119	96	101	103	117	114	99	124	108	100	104	101	121	125	121	143	105	113		118	106	140
	Zr		174	137	204	123	129	125	118	111	125	103	71	88	117	121	136	176	166	169	106	104	112	123	213
	Ce
	Dy
	Sm
	Nd
	Computed Ratios:
	Ba\Zr
	Ba\Sr
	Ba\Y
	Zr\Nb
	TiO2\P2O5
	MgO\Ti
	Mg Number
	Ba*100
	Sr*100
	Zr*100
	143Nd/144Nd
	87Sr/86Sr

## Sheet: Subaarao et al_1988
	Full Citation		Subbarao, K.V., Bodas, M.S., Hooper, P.R., and Walsh, J.N. (1988) Petrogenesis of Jawhar and Igatpuri Formations Western Deccan Basalt Province. Memoir, Geol. Soc. India, v. 10, pp. 253 - 280
	Location of the sampling		Western Deccan
	Analysis done at		NA
			Fig. 5: Variation of TiO2 and P2O5 vs stratigraphic position
			Fig. 6: Variation of incompatible elements against Zr for the Jawhar and Igatpuri Formations
	Variation diagrams plotted		Fig. 7: TiO2 vs P2O5 variation diagram for Jawhar and Igatpuri Formations showing positive correlation
			Fig. 8: Variation of LIL element in Zr in CTs from the Jawhar and Igatpuri Formations
			Fig. 9: Zr vs P2O5 variation diagram for the Jawhar and Igatpuri Formations
			Fig. 10: Variation of metal elements against Zr from different CTs of the Jawhar and the Igatpuri Formations
			Fig. 11: MgO vs TiO2 and P2O5 diagram for the Jawhar and Igatpuri Formations showing negative correlation
			Fig. 12: Variation of CaO and Al2O3 against Zr showing negative correlation
			Fig. 13: Zr Vs Sr variation diagram for Jawhar and Igatpuri Formations
			Fig. 14: Variation of Ni Vs MgO for Jawhar and Igatpuri Formations suggesting presence of olivine in fractionation
			Fig. 15: Cr Vs Ni variation diagram for the Jawhar and Igatpuri Sequence
0	Formation Name assigned by authors		Jawhar	Jawhar	Jawhar	Jawhar	Jawhar	Jawhar	Jawhar	Jawhar	Jawhar	Igatpuri	Igatpuri	Igatpuri	Igatpuri	Igatpuri
	Chemical Types assigned by authors		JW CT 1	JW CT 1	JW CT 2	JW CT 2	JW CT 2	JW CT 3	JW CT 3	JW CT 3	JW CT 3	IG CT 1	IG CT 1	IG CT 1	IG CT 2	IG CT 2
	Sample No (as in paper)		TRM2	JW54	JW36	JW43	JW41	TRM4	JW42	KK17	IG30	TRM7	JW5	TRM11	TRM8	IGO32
	Altitude of Sample (if given)
	Altitude of Sample (as can be inferred)
	Sr no of analysis in paper		1	2	3	4	5	6	7	8	9	10	11	12	13	14
	Sr no in Data base		SU88 01	SU88 02	SU88 03	SU88 04	SU88 05	SU88 06	SU88 07	SU88 08	SU88 09	SU88 10	SU88 11	SU88 12	SU88 13	SU88 14
	Major element (oxide wt %)
	SiO2		51.63	50.88	50.12	50.67	50.88	50.94	50.8	51.77	51.78	50.61	49.77	51.3	51.57	50.05
	TiO2		1.64	1.4	1.79	1.75	1.75	2.52	2.76	2.97	2.91	1.67	1.62	1.79	2.13	2.27
	Al2O3		13.78	15.05	15.02	14.87	14.96	13.49	13.64	13.26	13.63	14.25	14.39	14.28	14.4	14.47
	Fe2O3		5.43	5.25	5.77	5.71	5.63	6.73	6.68	6.79	6.46	5.91	5.78	5.78	6.09	6.08
	Fe*
	MgO		7.65	6.93	5.98	5.95	5.88	5.39	4.99	4.86	4.62	7.44	7.55	7.27	5.78	5.8
	CaO		11.08	10.7	10.77	10.51	10.44	9.67	9.06	8.95	8.91	10.25	10.58	10.24	9.27	10.09
	Na2O		1.89	2.69	2.76	2.91	2.88	2.35	2.82	2.23	2.79	2.15	2.79	1.93	2.55	3.06
	K2O		0.34	0.76	0.8	0.74	0.77	0.72	1.1	0.93	1.01	0.61	0.53	0.43	0.84	0.81
	P2O5		0.15	0.16	0.21	0.2	0.2	0.2	0.28	0.3	0.27	0.32	0.17	0.19	0.2
	MnO		0.18	0.16	0.18	0.17	0.17	0.2	0.19	0.19	0.18	0.17	0.17	0.16	0.17	0.16
	FeO (if given)		6.22	6.01	6.61	6.54	6.45	7.71	7.65	7.77	7.4	6.77	6.63	6.62	6.98	6.97
	LOI (if given)
	TOTAL (if given)
	Trace Element (in ppm)
	Ba		131	189	251	247	252	221	260	250	263	238	244	185	180	232
	CO		38	38	41	40	40	48	43	34	44	49	46	41	46	41
	Cr		281					113			116	210		240	106
	Cu		56	79	102	109	100	149	138	103	183	62	102	45	58	109
	Li
	Nb		9	7	9	9	9	17	19	16	18	9	8	10	11
	Ni		87	116	127	122	128	79	81	43	74	182	94	97	92	126
	Sc		34	34	33	32	32	33	30	29	30	34	35	30	29	29
	Sr		199	169	246	234	237	270	258	274	273	224	244	232	238	228
	Rb
	V		286	266	329	318	313	382	371	393	387	291	325	298	351	329
	Y		28	34	32	30	31	37	39	42	39	29	30	29	35	33
	Zn		92	93	114	106	101	123	131	113	131	104	134	94	113	108
	Zr		126	109	134	134	138	190	215	171	214	122	122	135	179	171
	Ce
	Dy
	Sm
	Nd
	Computed Ratios:
	Ba\Zr
	Ba\Sr
	Ba\Y
	Zr\Nb
	TiO2\P2O5
	MgO\Ti
	Mg Number
	Ba*100
	Sr*100
	Zr*100
	143Nd/144Nd
	87Sr/86Sr

## Sheet: Allmukhamdov & Zolotukhin_1988
	Full Citation		Allmukhamdov, A.I. and Zolotukhin, V.V. (1988) Geochemistry of Low Potassic basalts from Siberian and Deccan Traps. Geol. Soc. India, Memoir 10, pp. 341-351
	Location of the sampling		Eastern Traps (Nagpur and Hyderabad)
	Analysis done at		NA
	Variation diagrams plotted		Fig. 5: Normalised REE content in basalts of Siberia and India
	Formation Name assigned by authors
	Chemical Types assigned by authors
	Sample No (as in paper)		IN - 1	IN - 2	IN - 3	IN - 4	IN - 5	IN - 6	IN - 7	IN -8	IH - 1/1	IH - 1/2	IH - 1/3	IH - 21	IH - 3	IH - 3A	IH - 4	IH - 5
	Altitude of Sample (if given)
	Altitude of Sample (as can be inferred)
	Sr no of analysis in paper		1	2	3	4	5	6	7	8	9	10	11	12	13	14	15	16
	Sr no in Data base		AZ88 01	AZ88 02	AZ88 03	AZ88 04	AZ88 05	AZ88 06	AZ88 07	AZ88 08	AZ88 09	AZ88 10	AZ88 11	AZ88 12	AZ88 13	AZ88 14	AZ88 15	AZ88 16
	Major element (oxide wt %)
	SiO2		48.98	47.86	49.16	49.42	49	47.49	47.62	48.81	48.09	48.08	48.18	48.22	48.51	48.27	48.04	48.68
	TiO2		2.4	1.78	2.25	1.93	2.07	2.7	2.84	2.71	2.52	2.56	2.52	2.59	2.59	2.65	2.59	2.4
	Al2O3		12.89	14.7	13.68	14.42	13.78	13.42	13.28	13.13	13.32	13.42	13.67	13.36	13.55	13.44	13.54	13.39
	Fe2O3		2.77	5.51	3.1	3.72	4.1	5.21	4.36	4.45	4.79	4.48	3.28	4.33	3.79	3.87	3.68	3.28
	Fe*
	MgO		5.54	6.96	6.06	6.01	6.51	6.66	6.14	5.2	6.63	6.61	6.84	6.92	6.64	6.3	6.72	6.77
	CaO		10.37	11.54	10.64	11	11.1	10.56	10.64	10.33	10.99	11.04	10.96	10.94	10.92	10.95	11.04	10.83
	Na2O		2.37	2	2.19	2.2	2.24	2.2	2.25	2.65	2.14	2.17	2.22	2.23	2.14	2.25	2.15	2.08
	K2O		0.38	0.12	0.23	0.21	0.23	0.23	0.23	0.31	0.23	0.22	0.36	0.2	0.25	0.25	0.21	0.17
	P2O5		0.19	0.13	0.18	0.16	0.17	0.22	0.23	0.22	0.21	0.21	0.21	0.2	0.21	0.21	0.2	0.19
	MnO		0.22	0.18	0.21	0.2	0.21	0.19	0.21	0.24	0.2	0.19	0.2	0.19	0.2	0.19	0.19	0.2
	FeO (if given)		12.48	6.02	11.22	9.25	8.89	8.44	10.33	9.88	8.66	8.87	10.24	9.19	9.66	9.73	9.61	10.15
	LOI (if given)		1.53	3.8	1.67	2.07	2.13	3.2	2.32	2.22	2.76	2.75	1.78	2.12	1.98	2.11	2.41	2.41
	TOTAL (if given)		100.12	100.6	100.59	100.59	100.45	100.53	100.45	100.15	100.54	100.6	100.46	100.49	100.43	100.17	100.38	99.55
	Trace Element (in ppm)
	Ba		130	59	120	100	110	90	120	110	73	80	130	71	110	100	83	110
	CO		39	38	41	45	42	39	45	34	33	32	37	42	44	41	38	53
	Cr		42	150	38	34	58	130	180	27	240	230	180	260	180	260	200	160
	Cu		360	130	280	310	280	280	470	310	140	160	180	160	220	240	220	310
	Li		6	6	5	4	4	4	4	4	4	5	4	5	5	6	5	5
	Nb		5.4	10									7.6
	Ni		65	64	73	73	75	88	94	44	100	110	120	100	90	82	72	85
	Sc		25	34	31	28	32	28	24	23	32	26	26	29	28	26	26	37
	Sr		260	310	260	190	240	390	390	180	300	310	290	390	370	380	300	320
	Rb		8	2	3	2	4	1	3	4	2	4	6	2	4	5	3	1
	V		350	250	330	300	350	300	440	320	380	320	320	430	250	420	260	440
	Y		31		26						28
	Zn		300	210	180	170	95	100	100	140	260	220	190	160	110	120	180	300
	Zr		100	90	120	110	100	140	120	120	88	93	120	93	160	140	110	150
	Ce		26			12							29
	Dy		6.4			5.4							5.8
	Sm		6.2			4.7							5.7
	Nd		22			17							19
	Computed Ratios:
	Ba\Zr
	Ba\Sr
	Ba\Y
	Zr\Nb
	TiO2\P2O5
	MgO\Ti
	Mg Number
	Ba*100
	Sr*100
	Zr*100
	143Nd/144Nd
	87Sr/86Sr

## Sheet: Subbarao et al 1988 Narmada
	Full Citation		Subbarao, K.V., Sreenivasa Rao, M., and Ramasubba Reddy, N.(1988) Use of correlation coefficient patterns in Chemical stratigraphy and Petrology - A case study of the Deccan Volcanics in parts of the Narmada region. Geol.Soc. India Memoir 10, pp. 199 - 212
	Location of the sampling		Narmada region (these are averaged analysis based on 33 samples)
	Analysis done at		NA
	Variation diagrams plotted		Fig. 1: selected chemical parameters and magnetic polarity data plotted against stratigraphic height for the Khalghat-Mhow section
			Fig.2: correlation coefficients for Sr and K against other elements.
	Formation Name assigned by authors		Narmada	Manpur	Mhow
	Chemical Types assigned by authors
	Sample No (as in paper)
	Altitude of Sample (if given)
	Altitude of Sample (as can be inferred)
	Sr no of analysis in paper		1	2	3
	Sr no in Data base		SU88 15	SU88 16	SU88 17
	Major element (oxide wt %)
	SiO2		50.54	50.51	50.25
	TiO2		2.46	2.73	2.17
	Al2O3		14.36	15.16	14.27
	Fe2O3		5.71	5.98	6.31
	Fe*
	MgO		5.76	5.46	6.31
	CaO		10.46	9.41	10.08
	Na2O		2.38	2.5	2.5
	K2O		0.66	0.79	0.35
	P2O5		0.26	0.27	0.23
	MnO		0.2	0.18	0.19
	FeO (if given)
	LOI (if given)
	TOTAL (if given)
	Trace Element (in ppm)
	Ba		163	230	109
	CO		37	40	39
	Cr		103	93	102
	Cu		199	129	236
	Li
	Nb		40	32	32
	Ni		108	91	106
	Sc		35	32	38.5
	Sr		291	253	222
	Rb
	V		352	312	398
	Y		33	36	37
	Zn		116	119	126
	Zr		167	168	160
	Ce
	Dy
	Sm
	Nd
	Computed Ratios:
	Ba\Zr
	Ba\Sr
	Ba\Y
	Zr\Nb
	TiO2\P2O5
	MgO\Ti
	Mg Number
	Ba*100
	Sr*100
	Zr*100
	143Nd/144Nd
	87Sr/86Sr

## Sheet: Devey and Stephens_1991
	Full Citation		Devey, C.W., and Stephens W.E. (1999), Tholeiitic dykes in the Seychelles and the original spatial extent of the Deccan. Jour., Geol.Soc. London., v. 148, pp. 979-983
	Location of the sampling		Western Deccan (Vaur section)
	Analysis done at		Oxford University
	Variation diagrams plotted		Fig. 1 Initial Sr Isotop Ratios Vs Mg No. for Deccan, Parana and Praslin Island rock
			Fig. 2 Nd-Sr and Pb isotope diagram
			Fig. 3 Primitive mantle-normalised trace element patterns for Bushe, Ambaneli and Poladpur Formations
	Formation Name assigned by authors		Bushe	Bushe	Bushe	Bushe	Bushe	Bushe
	Chemical Types assigned by authors
	Sample No (as in paper)		VAUR9	VAUR10	VAUR11	VAUR12	VAUR13	VAUR14
	Altitude of Sample (if given)
	Altitude of Sample (as can be inferred)
	Sr no of analysis in paper		1	2	3	4	5	6
	Sr no in Data base		DS91 01	DS91 02	DS91 03	DS91 04	DS91 05	DS91 06
	Major element (oxide wt %)
	SiO2		52.33	51.87	54.78	54.41	51.38	51.62
	TiO2		0.98	1	0.92	1.17	1.25	1.18
	Al2O3		14.57	15.18	14.33	14.61	14.97	15.27
	Fe2O3		11.29	11.11	10.84	11.15	11.93	11.45
	Fe*
	MgO		8.65	7.39	7.13	6.42	6.62	7.94
	CaO		9.97	10.46	7.58	10.42	11.36	10.93
	Na2O		2.04	1.79	1.76	2.32	2.31	2.27
	K2O		0.44	0.54	2.69	0.47	0.46	0.17
	P2O5		0.1	0.11	0.1	0.12	0.13	0.13
	MnO		0.14	0.18	0.16	0.16	0.16	0.18
	FeO (if given)
	LOI (if given)
	TOTAL (if given)		100.51	99.02	100.29	101.25	100.57	101.14
	Trace Element (in ppm)
	Ba		158	126	362	135	131	95
	CO
	Cr
	Cu
	Li
	Nb		5	4	4	5	4	7
	Ni		167	116	143	72	133	116
	Sc
	Sr		180	275	153	159	163	172
	Rb		9	24	84	8	8	1
	V
	Y		23	23	24	29	29	28
	Zn
	Zr		89	89	81	99	104	100
	Ce		24.2	25.8
	Dy		3.69	3.62
	Sm		3.12	3.08
	Nd		12.7	12.7
	Computed Ratios:
	Ba\Zr
	Ba\Sr
	Ba\Y
	Zr\Nb
	TiO2\P2O5
	MgO\Ti
	Mg Number		64.32	61.02	60.75	57.53	56.63	62
	Ba*100
	Sr*100
	Zr*100
	143Nd/144Nd
	87Sr/86Sr		0.71923	0.71541	0.71919	0.71659	0.71649	0.71617

[truncated: 30 more sheets: Deshmukh et al, 1996, Deshmukh et al_1996, Godbole and Chatterjee_1996, Godbole et al_1996, Nair et al_1996, Sengupta and Deshmukh_1996, Shekhawat and Sharma_1996, Solanki et al_1996, Yedekar et al_1996, Khadri et al 1999, Khadri et al 1999 Malwa Traps, Bilgrami et al (1999), Mohoney et al_2000, Bakshi et al_2001, Knight et al_2003, Sheth et al_2004, Jay and Widdowson_2008, Duraiswami et al_2008, Brown et al, 2011, Duraiswami et al_2014 …]
