# Supplementary material
Source: publisher figshare collection journal article supplement (https://gsapubs.figshare.com/articles/dataset/_/12541442)
Supplement: Supplementary file 2 [file 1]

## Supplemental Data #1 :

### Geochemical data of Deccan Volcanic Province

#### 1.1 GEOCHEMICAL DATABASE

The compiled geochemical data in the attached MS Excel Workbook (attached as “**Data Repository File DR2.xlsx**”) covers published data on the chemical analyses of the Deccan Trap basaltic flows from 1986 to 2014. The bibliography appended includes citations of the publications listed with the index number of the database listing appended to it. Each spreadsheet in this file covers one individual publication with the metadata given in SD#1 Table 1. The Formation or chemical type name is listed as assigned by the authors.

**SD#1 Table 1 (a):** Metadata of chemical analyses from each publication compiled in the database.

|                             |                                                                                    |
|-----------------------------|------------------------------------------------------------------------------------|
| Full Citation               | Gives the complete citation of the publication from which the data has been taken. |
| Location of the sampling    | Subprovince of the DVP (with added details)                                        |
| Analysis done at            | Laboratory / Laboratories in which the analyses were carried out.                  |
| Variation diagrams plotted  | Listed as in publication                                                           |
| Formation Name              | Where classified / assigned by the author(s)                                       |
| Chemical Types              | Where classified / assigned by the author(s)                                       |
| Sample No                   | As listed by the author(s)                                                         |
| Altitude of Sample          | Where given by the author(s)                                                       |
| Inferred Altitude of Sample | As determined from the publication or by plotting the sample location              |
| Data base no of analysis    | Only given in Compiled data sheet                                                  |

**SD#1 Table 1 (b):** Listing of analytical components included in the database.

| Major Oxides                   |                                                         | Trace Elements |         |    |         | Computed Ratios                                 |                                                                                      |
|--------------------------------|---------------------------------------------------------|----------------|---------|----|---------|-------------------------------------------------|--------------------------------------------------------------------------------------|
| SiO <sub>2</sub>               | In Weight percentage.                                   | Ba             | In PPM. | Rb | In PPM. | Ba\Zr                                           | If and as given by the author(s). We have not computed these ratios in the database. |
| TiO <sub>2</sub>               |                                                         | Co             |         | V  |         | Ba\Sr                                           |                                                                                      |
| Al <sub>2</sub> O <sub>3</sub> |                                                         | Cr             |         | Y  |         | Ba\Y                                            |                                                                                      |
| Fe <sub>2</sub> O <sub>3</sub> |                                                         | Cu             |         | Zn |         | Zr\Nb                                           |                                                                                      |
| MgO                            |                                                         | Li             |         | Zr |         | TiO <sub>2</sub> \P <sub>2</sub> O <sub>5</sub> |                                                                                      |
| CaO                            |                                                         | Nb             |         | Ce |         | MgO\Ti                                          |                                                                                      |
| Na <sub>2</sub> O              |                                                         | Ni             |         | Dy |         | Mg Number                                       |                                                                                      |
| K <sub>2</sub> O               |                                                         | Sc             |         | Sm |         | Ba*100                                          |                                                                                      |
| P <sub>2</sub> O <sub>5</sub>  |                                                         | Sr             |         | Nd |         | Sr*100                                          |                                                                                      |
| MnO                            |                                                         |                |         |    |         |                                                 |                                                                                      |
| FeO                            | If and as given by the author(s); in Weight percentage. |                |         |    |         | <sup>143</sup> Nd/ <sup>144</sup> Nd            |                                                                                      |
| LOI                            |                                                         |                |         |    |         | <sup>87</sup> Sr/86Sr                           |                                                                                      |
| TOTAL                          |                                                         |                |         |    |         |                                                 |                                                                                      |

The analytical data (SD #1 Table 2) of major oxides is given in wt% and the trace element concentration is measured in ppm. FeO and LOI are listed in the database only if the authors have given it. The computed and isotopic ratios have also been incorporated as and if published by the authors. This compilation consists of more than 800 chemical analyses and represents sampling locations across the DVP. Blank data cells indicate that the authors have not given the relevant data in their publications. SD#1 Table 2 below lists the counts, maximum – minimum and average values of various components of the database. Statistically, it represents a large population, covering all the geographic areas of the DVP as well as all the chemo-stratigraphic units of the province.

**SD#1 Table 2:** Basic statistics of the database.

|                                               | No of entries | Max    | Min   | Average |                        | No of entries | Max     | Min  | Average |
|-----------------------------------------------|---------------|--------|-------|---------|------------------------|---------------|---------|------|---------|
| Major oxide wt %                              |               |        |       |         | Trace Element (in ppm) |               |         |      |         |
| <b>SiO<sub>2</sub></b>                        | 784           | 76.62  | 45.80 | 50.16   | <b>Ba</b>              | 764           | 685.0   | -    | 143.7   |
| <b>TiO<sub>2</sub></b>                        | 784           | 3.88   | 0.73  | 2.23    | <b>Co</b>              | 495           | 513.0   | 4.0  | 58.7    |
| <b>Al<sub>2</sub>O<sub>3</sub></b>            | 784           | 18.90  | 6.30  | 13.60   | <b>Cr</b>              | 645           | 1,981.0 | 10.0 | 166.4   |
| <b>Fe<sub>2</sub>O<sub>3</sub> / Fe total</b> | 817           | 17.87  | 0.99  | 11.06   | <b>Cu</b>              | 649           | 1,076.0 | 45.0 | 196.0   |
| <b>MgO</b>                                    | 784           | 15.63  | 2.68  | 6.14    | <b>Li</b>              | 222           | 366.0   | 4.0  | 40.9    |
| <b>CaO</b>                                    | 784           | 15.98  | 1.45  | 10.25   | <b>Nb</b>              | 654           | 40.0    | 4.0  | 12.3    |
| <b>Na<sub>2</sub>O</b>                        | 784           | 5.29   | 0.14  | 2.28    | <b>Ni</b>              | 713           | 548.0   | 18.0 | 87.7    |
| <b>K<sub>2</sub>O</b>                         | 784           | 5.76   | 0.01  | 0.59    | <b>Sc</b>              | 671           | 376.0   | 3.0  | 42.1    |
| <b>P<sub>2</sub>O<sub>5</sub></b>             | 784           | 1.35   | 0.00  | 0.23    | <b>Sr</b>              | 801           | 789.0   | 3.4  | 214.5   |
| <b>MnO</b>                                    | 784           | 19.00  | 0.01  | 0.23    | <b>Rb</b>              | 595           | 439.0   |      | 57.9    |
| <b>FeO (if given)</b>                         | 446           | 17.87  | 4.98  | 9.82    | <b>V</b>               | 626           | 600.0   | 7.0  | 361.5   |
| <b>LOI (if given)</b>                         | 182           | 7.77   | 0.01  | 1.47    | <b>Y</b>               | 757           | 440.0   | 16.0 | 52.7    |
| <b>TOTAL (if given)</b>                       | 238           | 102.99 | 95.95 | 99.21   | <b>Zn</b>              | 629           | 381.0   | 16.0 | 111.1   |
|                                               |               |        |       |         | <b>Zr</b>              | 805           | 577.0   | 20.0 | 149.2   |
|                                               |               |        |       |         | <b>Ce</b>              | 351           | 255.0   | 12.0 | 48.4    |
|                                               |               |        |       |         | <b>Dy</b>              | 248           | 304.0   | 2.5  | 6.5     |
|                                               |               |        |       |         | <b>Sm</b>              | 227           | 56.0    | 2.1  | 12.0    |
|                                               |               |        |       |         | <b>Nd</b>              | 220           | 37.1    | 3.0  | 18.3    |

Subsequent workers used this data in support of their respective correlations and derivative models / theses. We therefore avoid any critique on this data, standards used and comparability in this compilation. The ‘chemical type/ chemostratigraphic unit’ tag assigned to individual analysis listed as given by the author(s) in the source publication. We have not re-assigned any of these names. A fairly large number of ‘unassigned’ analyses are present in this compilation, since the authors did not assign them to any of the established formation / chemical type as defined along the Western Ghats.

## 1.2 CHEMICAL STRATIGRAPHY OF DVP – A RECAP

Washington (1922) had commented that there is very little variation in the tholeiitic flows from the Deccan in terms of their chemical compositions. Najafi et al. (1981) demonstrated that successive lava flows display a systematic variation in their chemical composition; interpreted by them as of a progressive variation in the magmatic fractionation. They suggested that packets of lavas stacked one above the other show diverse crustal contamination and fractionation indices, enabling their grouping based on chemistry.

Cox and Hawkesworth (1985) and Sreenivasa Rao et al. (1985) were the earliest attempt to classify and name the flow-packets in the Deccan Traps based on their chemical composition. Beane et al. (1986) proposed the division of the basaltic stack of the Western Ghats into 10 “formations” from 3 “subgroups” based on the field mapping, petrochemical and isotopic studies. Geochemical characters and stratigraphic height were the primary criteria defining the formations (Devey and Lightfoot, 1986). These observations and the data (compiled in the edited volume – Subbarao, 1988) were followed in the subsequent studies across the DVP. The presence of GPB horizons at multiple levels within this sequence in the Western DVP helped map and extrapolate the chemostratigraphic units with greater confidence, wherever present.

A common observation from studies of chemical typing of the basalts in the Western DVP is that the major oxides (barring the MgO number to some extent) do not provide any clear demarcation of the proposed chemo-stratigraphic units. The boundaries defined by trace elements are commonly transitional and/or overlapping. Only the initial Sr isotopic ratios display breaks and can be used as principle criterion for identifying Formation boundaries (Mitchell and Widdowson, 1991). Peng et al. (1994) opined that the isotopic data falling in or near the common signature region, where several Western Ghats arrays converge, reflects low crustal contamination process operating in a large-scale open system during emplacement of the lower Western Ghats lava pile. They suggested that alteration, crystal accumulation and intra-flow differentiation of some elements can explain the observed (a) overlap of the fields of the formations to the petrogenetically transitional nature of some formations (like the Poladpur) and (b) presence of some members in several formations with similar chemical composition. Their studies indicate that the oxide compositions of the Chikhaldara and Jabalpur region (in the eastern parts of the province) fall within or close to the fields of the Ambenali, Poladpur, Bushe and Khandala Formations (from western and southern parts of the province), however, isotopic ratios of some of the samples do not always fall in the same fields. They concluded that many of the northeastern Deccan lavas may not be correlatable with the southwestern lavas, suggesting a polycentric model of eruption for the Deccan basalts.

Subbarao and Hooper (1988) compiled the first regional chemostratigraphic map of the DVP. Mitchell and Widdowson (1991), Bilgrami (1999), Khadri et al (1999) and Jay et al (2008) have expanded the coverage of this chemostratigraphic classification to areas not covered in the first compilation. Subsequent workers have refined and further characterized the chemical parameters for distinguishing between the various units of the Deccan Traps (SD#1 Table 3) that is currently in vogue.

**SD#1 Table 3:** Chemical characters of Chemostratigraphic units from the Western DVP (after Vanderkluyzen et al, 2011; Sheth, 2016).

| Formation                | Member / Chemical type | ( <sup>87</sup> Sr/ <sup>86</sup> Sr) <sub>t</sub> | Average Mg-no. | TiO <sub>2</sub> wt% | Average Zr/Nb | Magnetic Polarity |
|--------------------------|------------------------|----------------------------------------------------|----------------|----------------------|---------------|-------------------|
| <b>Wai Subgroup</b>      |                        |                                                    |                |                      |               |                   |
| Panhala                  | Desur                  | 0.7072 – 0.7080                                    | 48             | 1.6 – 1.9            | 11.4          | N                 |
|                          | Panhala                | 0.7046 – 0.7055                                    | 52             | 1.6 – 2.3            | 14.8          | N                 |
| Mahabaleshwar            |                        | 0.7040 – 0.7055                                    | 47             | 2.5 – 4.3            | 11.4          | N                 |
| Ambenali                 | Ambenali               | 0.7038 – 0.7044                                    | 49             | 1.9 – 3.1            | 14.4          | R                 |
| Poladpur                 | Upper                  | 0.7061 – 0.7088                                    | 52             | 1.8 – 2.3            | 12.7          | R                 |
|                          | Lower                  | 0.7053 – 0.7110                                    | 56             | 1.5 – 2.0            | 14.0          | R                 |
| <b>Lonavala Subgroup</b> |                        |                                                    |                |                      |               |                   |
| Bushe                    | Bushe                  | 0.713 – 0.720                                      | 55             | 1.0 – 1.3            | 15.3          | R                 |
|                          | Shingi Hill            | 0.718 – 0.7181                                     | 49             | 1.3 – 1.4            | 16.2          | R                 |
|                          | Harishchandragad       | 0.712 – 0.7164                                     | 58             | 2.0 – 2.1            | 12.9          | R                 |
|                          | Karla Caves            | 0.7147 – 0.7150                                    | 68             | 1.1 – 1.2            | 19.7          | R                 |
|                          | Bhaja                  | 0.7040 – 0.7055                                    | 47             | 1.3 – 1.5            | 18.2          | R                 |
| Khadala                  | Rajmachi               | 0.7093 – 0.7102                                    | 44             | 2.1 – 2.5            | 14.6          | R                 |
|                          | Khadala Phyrlic        | 0.7077 – 0.7085                                    | 41             | 2.4 – 2.8            | 13.6          | R                 |
|                          | Dhak Dongar            | 0.7071 – 0.7072                                    | 40             | 2.9 – 3.1            | 13.1          | R                 |
| <b>Kalsubai Subgroup</b> |                        |                                                    |                |                      |               |                   |
| Bhimashankar             | Monkey Hill GPB        | 0.7073 – 0.7075                                    | 41             | 3.1 – 3.4            | 12.2          | R                 |
|                          | Giravali GPB           | 0.7068 – 0.7074                                    | 45             | 2.8 – 3.1            | 12.1          | R                 |
|                          | Bhimashankar           | 0.7067 – 0.7077                                    | 47             | 1.9 – 2.6            | 11.7          | R                 |
| Thakurvadi               | Manchar GPB            | 0.7075 – 0.7077                                    | 42             | 2.9 – 3.1            | 13.2          | R                 |
|                          | Thakurvadi             | 0.7067 – 0.7088                                    | 58             | 1.8 – 2.2            | 12.0          | R                 |
|                          | Water Pipe             | 0.7099 – 0.7112                                    | 59             | 1.4 – 1.6            | 12.3          | R                 |
|                          | Jammu Patti            | 0.7066 – 0.7077                                    | 34-56          | 1.7 – 2.7            | 8.4 – 11.2    | R                 |
| Neral                    | Tunnel Five GPB        | 0.7082 – 0.7083                                    | 36             | 3.3 – 3.5            | 10.8          | R                 |
|                          | Neral                  | 0.7062 – 0.7073                                    | 62             | 1.5 – 1.7            | 12.3          | R                 |
|                          | Ambivli Picrite        | 0.7104                                             | 67             | 1.4 – 1.5            | 18.6          | R                 |
| Igatpuri                 | Kashele GPB            | 0.7102 – 0.7122                                    | 40             | 2.6 – 3.1            | 11.5          | R                 |
|                          | Igatpuri Phyrlic       | 0.7107 – 0.7124                                    | 49             | 1.9 – 2.2            | 14.3          | R                 |
| Jawahar                  | Thal Ghat GPB          | 0.7108                                             | 36             | 3.6                  | 10.7          | R                 |
|                          | Jawahar                | 0.7085 – 0.7128                                    | 38 - 59        | 1.3 – 3.0            | 10.8 – 13.0   | R                 |

The Kalsubai Subgroup, which hosts the oldest 5 formations are characterized by amygdaloidal ‘compound’ flows. They have picritic basalts (MgO > 10%) at the base and are capped by evolved plagioclase-phyric flows (GPBs). The succeeding Lonavala Subgroup, characterized by lower MgO contents, lower concentration of incompatible

trace elements and  $\text{TiO}_2$  (Cox and Hawkesworth, 1985), is subdivided into Khandala and Bushe Formations, comprising of dominantly 'simple' flows and coarse grained, aphyric 'compound' flows respectively.

The youngest Wai Subgroup consists of Poladpur, Ambenali and Mahabaleshwar Formations. This Subgroup has thick 'simple' flows that are easily traceable across long distances. They flows are more chemically evolved than those from the Kalsubai Subgroup. GPB horizons are lacking while rare picritic basalt are reported from the base of the Formations of this Subgroup. It is significant that none of the descriptions of this Subgroup (and its postulated extensions across the other parts of the DVP) mention the presence or relevance of a regional GPB horizon ('Purandar GPB': Karmarkar et al., 1971 / 'M4' in GSI, 2001) occurring at the top of the Ambenali Formation. Even the recent review of the GPBs (Sheth, 2016) has missed out on its stratigraphic significance. The Panhala Formation (informally named as Kolhapur flows) was added atop the Mahabaleshwar Formation based on the exposures of flows in the southernmost part of the Deccan Plateau with distinctly differing chemical characters (Lightfoot et al., 1990; Jay et al., 2008).

Several recent works (eg: Mitchel and Widdowson, 1991; Khadri, et al, 1999; Jay and Widdowson, 2008; Self et al., 2008; Vanderkluyzen et al., 2011; Peng et al., 2014; Shrivastava et al., 2014; Richards et al., 2015; Sheth et al., 2018) appear to have accepted this premise. The chemical stratigraphy established in the western DVP by multiple authors with several rounds of resampling is assumed by them to provide a robust foundation for expanding the correlation to other parts of the DVP.

The notional bounds of variations recognized by earlier authors (plotted in the variation diagrams as 'fields' of Formations serve as references for 'identifying the Formation' in these works) have been used for establishing these correlation. SD#1 Fig.1 is an example of such 'discriminant' bounds for the various fields. For example, the trace element ratios of dykes from the Sangmaner area (Bondre, et al., 2006) fall in diverse chemostratigraphic Formations. Yet, they interpreted them to belong to the Poladpur Formation on the basis of the  $^{87}\text{Sr}/^{86}\text{Sr}$  ratio versus  $\epsilon\text{Nd}$  plots alone. It is evident that there is a significant 'overlap' in the 'fields' so defined, leaving serious questions as to what formation an unknown analysis may be assigned to if it plots in such 'composite' fields. This problem is best exemplified by the arguments used in Bondre et al. (2006), Jay et al. (2008) and Duraiswami, et al. (2014). The interpretations of Shrivastava et al. (2014) and assignments to chemostratigraphic units from Western DVP illustrate the resulting confusion.

### 1.3 BINARY VARIATION PLOTS

To examine the validity of these classifications based on chemical data, we used the compiled data across the DVP to plot the most commonly used variation diagrams using

primary data or computed ratios to assess their efficacy in discriminating between stratigraphic units.

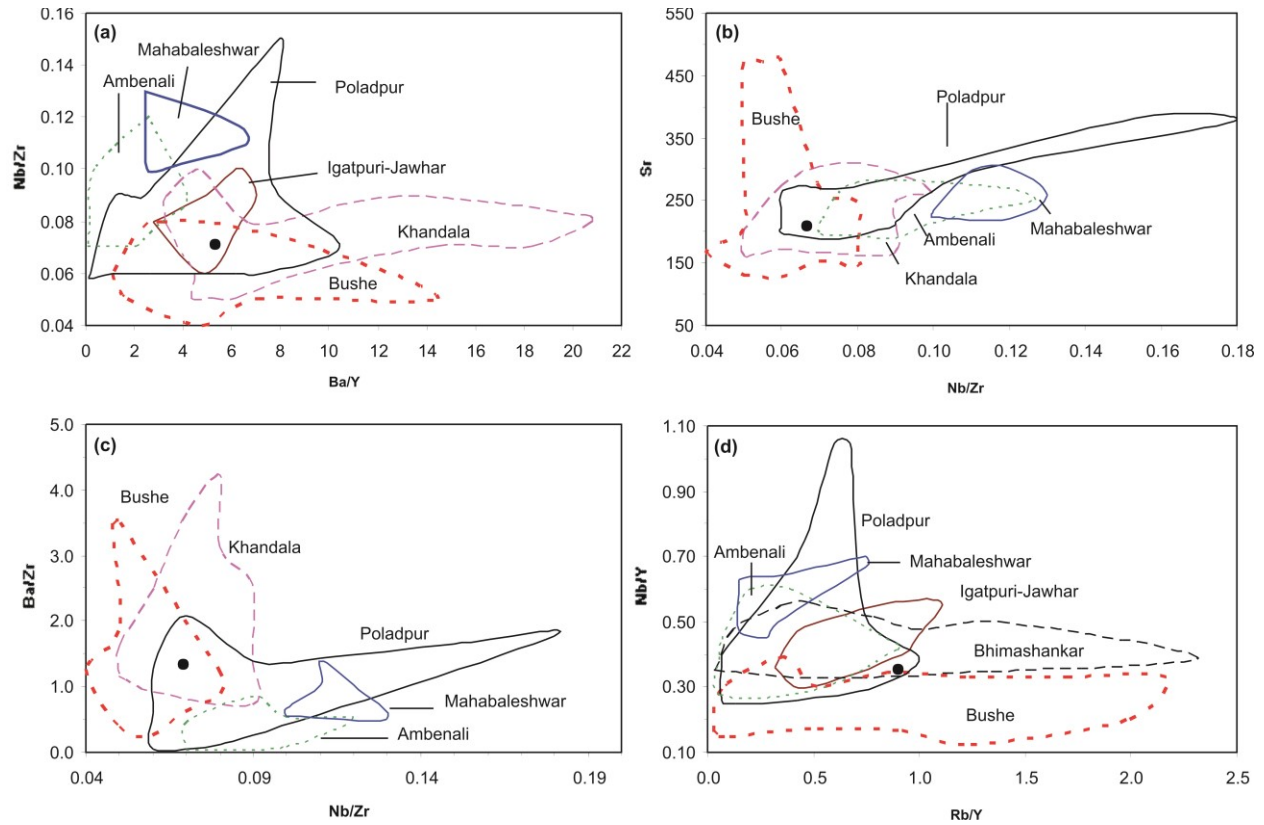

**SD#1 Fig.1:** Trace element variation diagrams for the DVP showing bounds of the fields of various constituent chemostratigraphic formations. (after Sheth et al., 2004) . Note the overlaps in the fields and the plots generated from the compiled database. There appears to be no diagnostic characters that will enable assignment of an unknown sample (black dot) to any specific Formation, but will only 'indicate a statistical probability.

So as to also examine if there is a regional pattern in the distribution of the chemical compositions of the basalts from the DVP, we have used the geographic subdivisions / subprovinces (see Fig.1 of the main paper) of the province to tag them to the region. The analyses tagged as 'Kutch' include those from Saurashtra and Kutch. We have used the Formation names assigned by the author(s) to plot the variation diagrams to assess how sharp the distinction between the recognized chemical types actually is (SD#1 Figures 2 - 14). As mentioned earlier, there are a fairly large number of analyses, where the author(s) have not tagged any specific formation name to the flow sampled. They are included as 'unassigned' samples. Chemical data available for the Kutch region is devoid of trace element data and hence not reflected in the relevant plots. The raw data for these plots is given in **Data Repository File DR2.xlsx**.

This compilation reaffirms the consistency in the chemical compositions of the Deccan flows across the entire province, with relatively minor variations. The variations relate to samples of either differentiates or specific variants of the tholeiitic lavas; but do not provide a discriminant distribution that may justify a stratigraphic or temporal connotation.

It will be evident from all these plots that although there is a range of variation of the primary composition as well as the various ratios (that may contribute to determination of the petrogenetic characters of the lava and their differentiation and maturation) across the DVP, the plots essentially cluster in a statistically coherent value range. It demonstrates very clearly that the chemical compositional variation across this large province is statistically uniform and suggests that there is a consistency in the magma source and venting systems throughout its vast expanse. No significant variance is observed between various sectors of the province.

Nor do these plots display a 'significant' discrimination between the chemical formations of the DVP. The discriminant plots used in earlier publications (eg: SD#1 Fig.1) show 'range of compositional variations' plotted based on studies in one / two sections in the Western DVP. They have a significantly large overlap and any composition plotting in the overlapping area may only be assigned to a formation at the author(s)' discretion, and not based on 'diagnostic' characters.

#### **1.4 DISCRIMINANT FUNCTIONS**

Given the overall similarity in compositions, statistical computations were proposed to discriminate between various formations (e.g. Beane et al, 1986; 1988; Subbarao, et al, 1994). Mahoney et al (2000) proposed a Discriminant Function Analysis (DFA). It is a multivariate statistical technique (Davis, 2002) to calculate the discriminant functions [Function 1= (  $-0.446\text{SiO}_2 - 0.129\text{Al}_2\text{O}_3 + 1.312\text{TiO}_2 + 0.124\text{CaO} + 1.398\text{P}_2\text{O}_5 + 0.503\text{Ba} + 0.302\text{Sr} - 1.699\text{Zr} - 0.727\text{Y} - 0.022\text{Nb}$  ); Function 2= (  $-0.203\text{SiO}_2 + 0.078\text{Al}_2\text{O}_3 - 0.257\text{TiO}_2 - 0.125\text{CaO} + 0.453\text{P}_2\text{O}_5 + 0.866\text{Ba} - 0.251\text{Sr} + 0.941\text{Zr} - 0.050\text{Y} - 1.221\text{Nb}$  ); Sheth et al., 2004] and compute the affinity of an unknown sample to a standard set of known samples. The oxide and elemental abundances in the equations of the two functions are Z-score standardized values.

While calculating the values for Functions the trace element data was converted to percentage weight and then all the data (major and trace) was normalized to 100. The recalculated and normalized values of major and trace elements used for the Function calculation are plotted on scatter plot of Function 1 versus Function 2. They were used (with or without modifications) by subsequent workers (Sheth et al., 2014, Vanderkluyzen, et al., 2011; Peng et al., 2014; Duraiswami, et al., 2014).

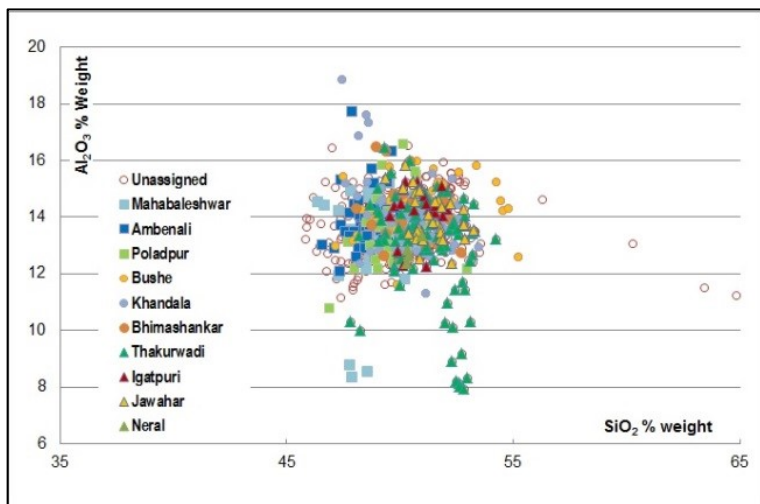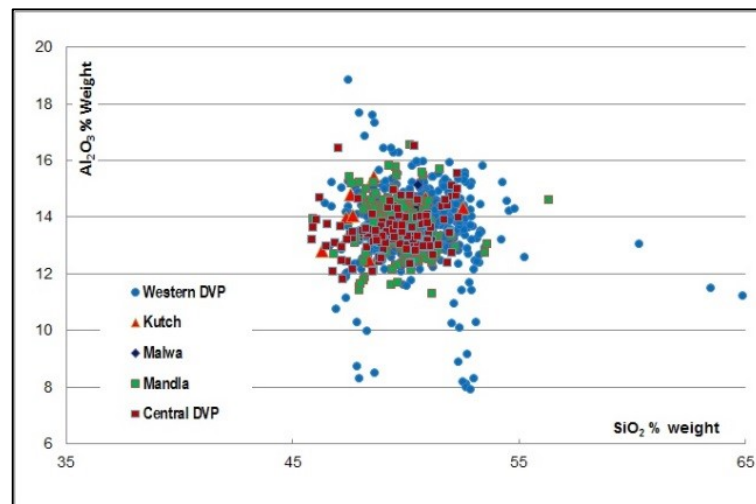

**SD#1 Fig.2:** Distribution of  $\text{Al}_2\text{O}_3$  v/s  $\text{SiO}_2$  in the DVP, with formation names (where assigned by respective authors) tagged to the data points in the left plot and region-wise classification in the right plot.

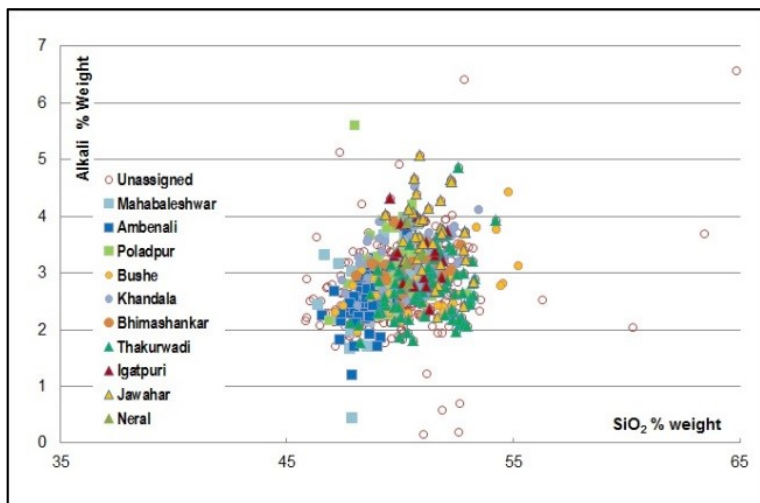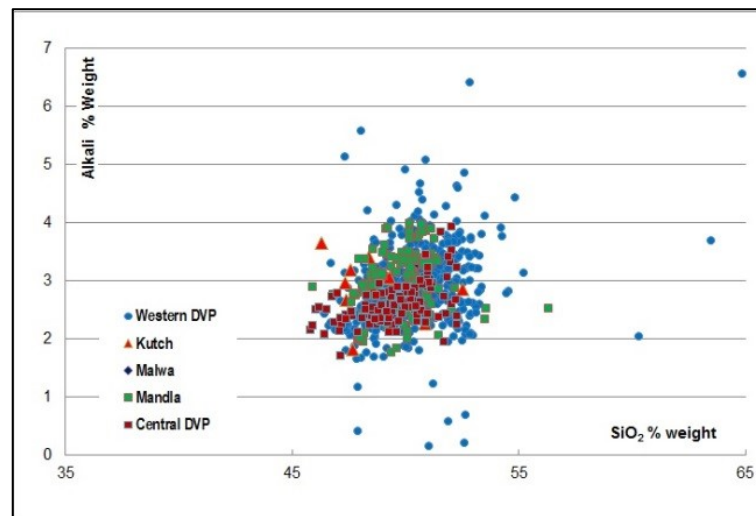

**SD#1 Fig.3:** Distribution of Alkali ( $\text{K}_2\text{O}+\text{Na}_2\text{O}$ ) v/s  $\text{SiO}_2$  in the DVP, with formation names (where assigned by respective authors) tagged to the data points in the left plot and region-wise classification in the right plot.



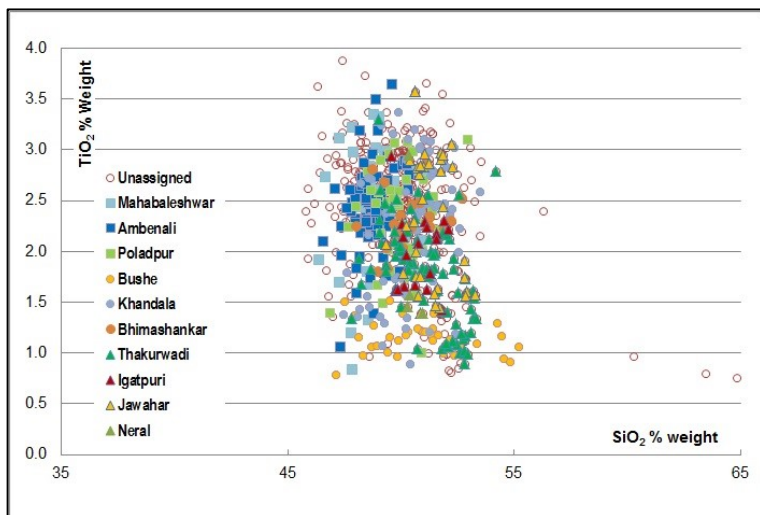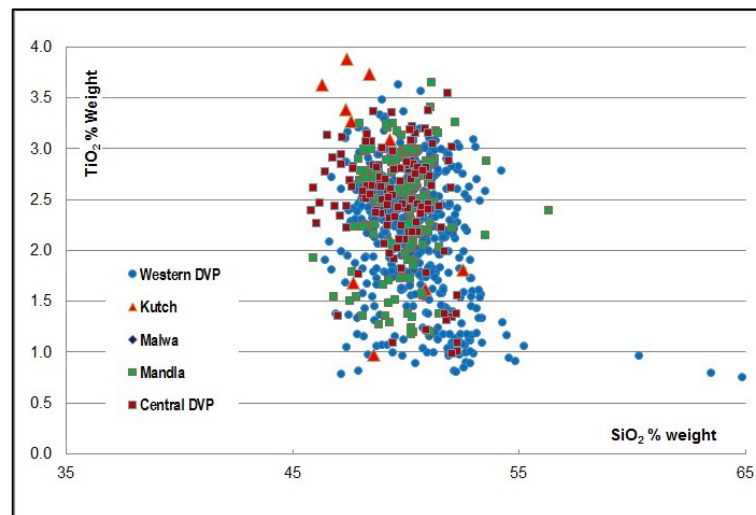

**SD#1 Fig.4:** Distribution of  $\text{TiO}_2$  v/s  $\text{SiO}_2$  in the DVP, with formation names (where assigned by respective authors) tagged to the data points in the left plot and region-wise classification in the right plot.

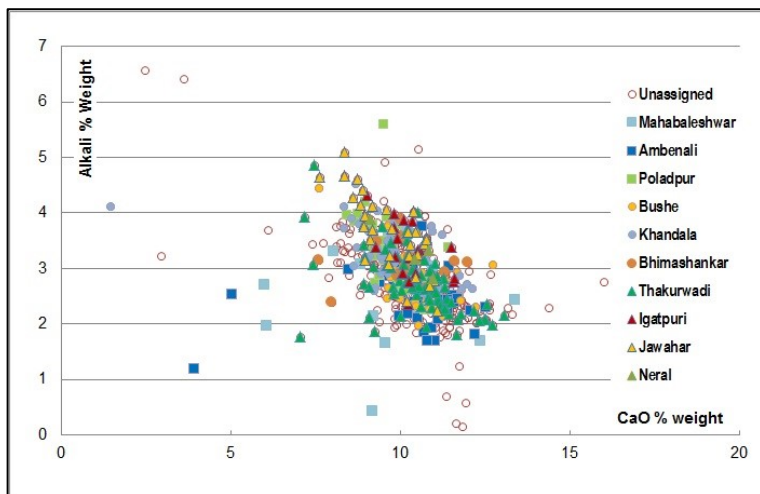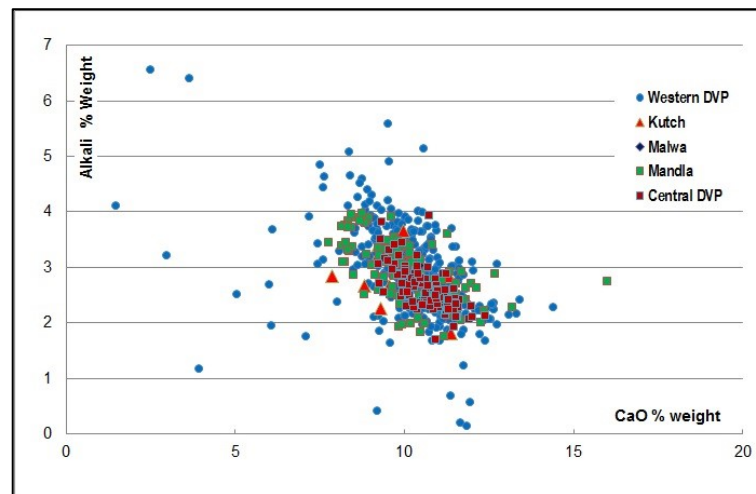

**SD#1 Fig.5:** Distribution of Alkali ( $\text{K}_2\text{O}+\text{Na}_2\text{O}$ ) v/s  $\text{CaO}$  in the DVP, with formation names (where assigned by respective authors) tagged to the data points in the left plot and region-wise classification in the right plot.

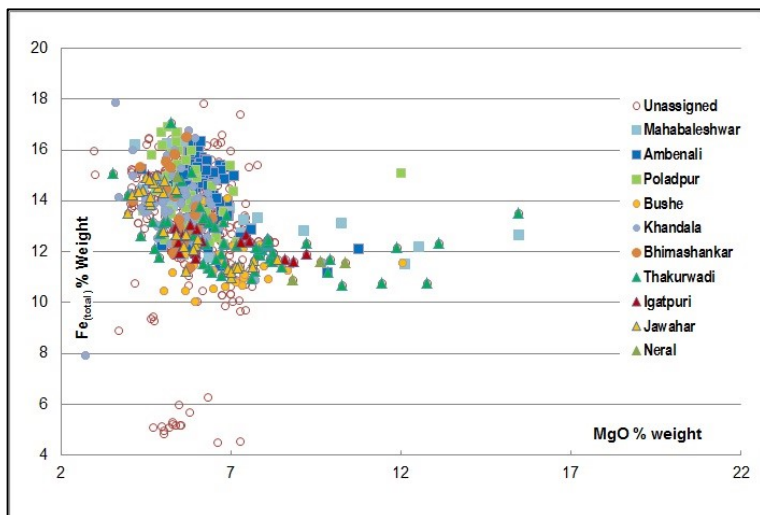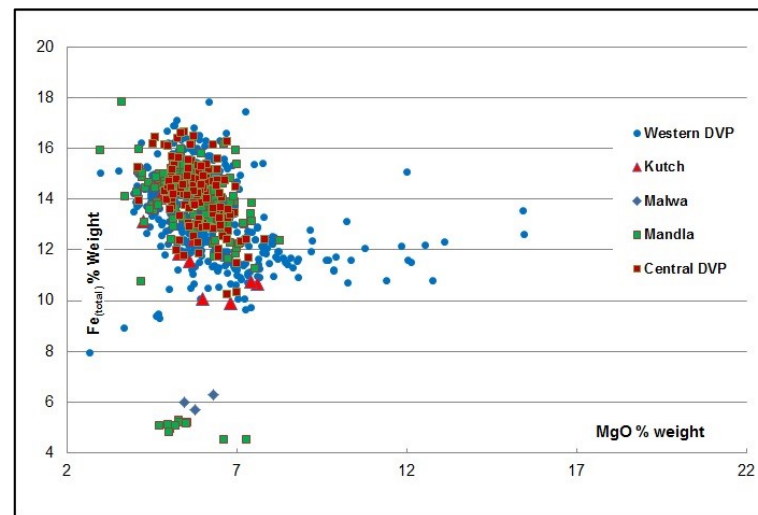

**SD#1 Fig.6:** Distribution of Iron oxides ( $\text{FeO}_{\text{tot}}$ ) v/s MgO in the DVP, with formation names (where assigned by respective authors) tagged to the data points in the left plot and region-wise classification in the right plot.

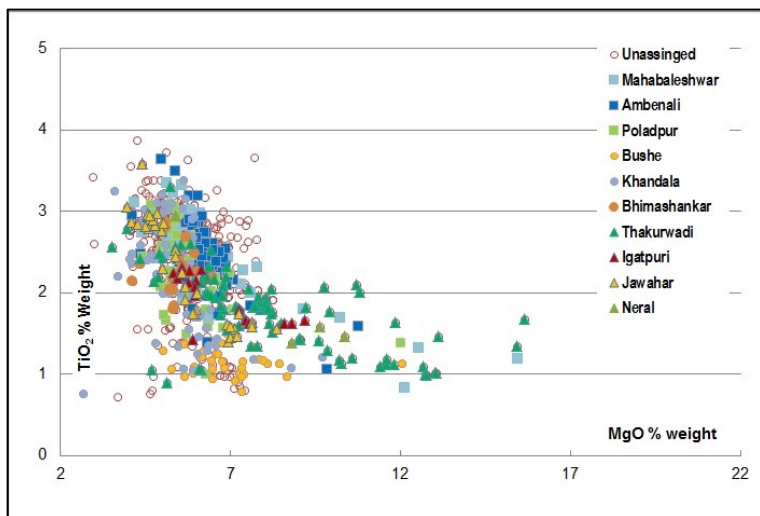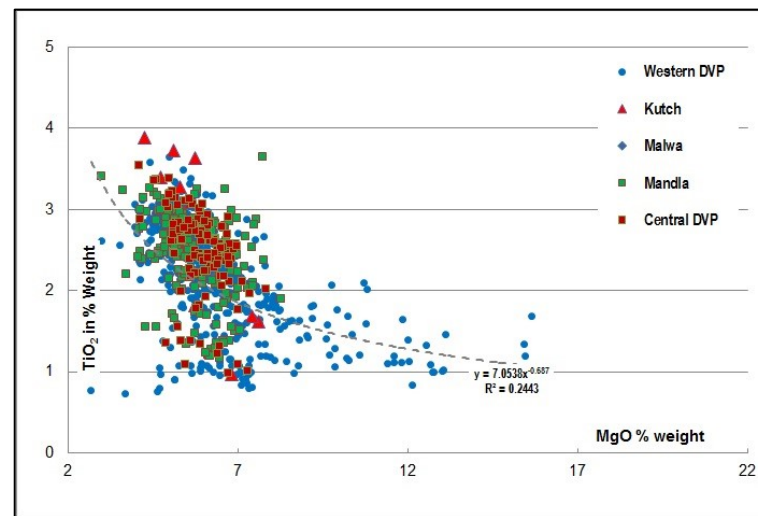

**SD#1 Fig.7:** Distribution of  $\text{TiO}_2$  v/s MgO in the DVP, with formation names (where assigned by respective authors) tagged to the data points in the left plot and region-wise classification in the right plot.

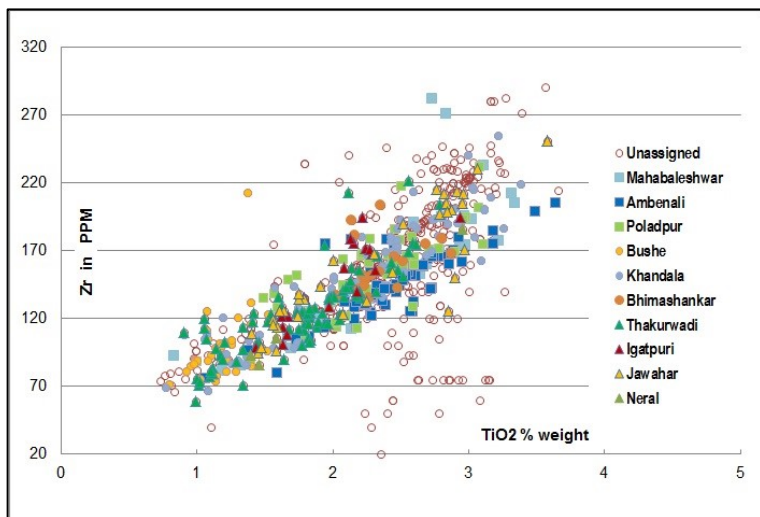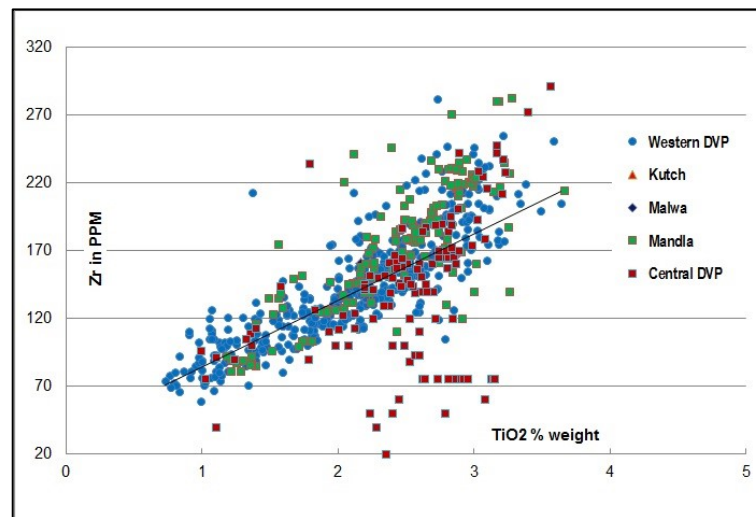

**SD#1 Fig.8:** Distribution of Zr v/s TiO<sub>2</sub> in the DVP, with formation names (where assigned by respective authors) tagged to the data points in the left plot and region-wise classification in the right plot. Symbols same as in Fig. 8 and 10.

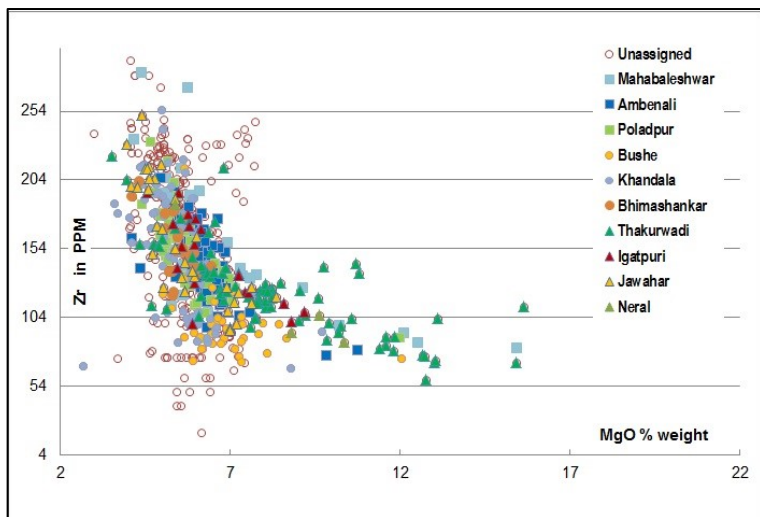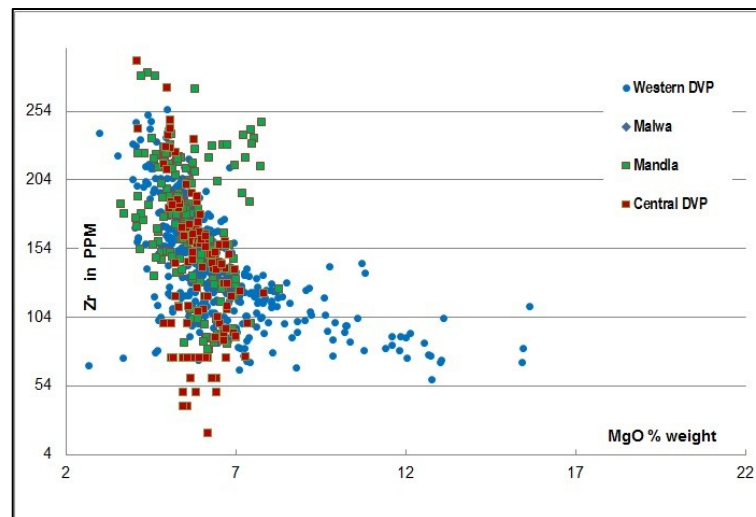

**SD#1 Fig.9:** Distribution of Zr v/s MgO in the DVP, with formation names (where assigned by respective authors) tagged to the data points in the left plot and region-wise classification in the right plot.

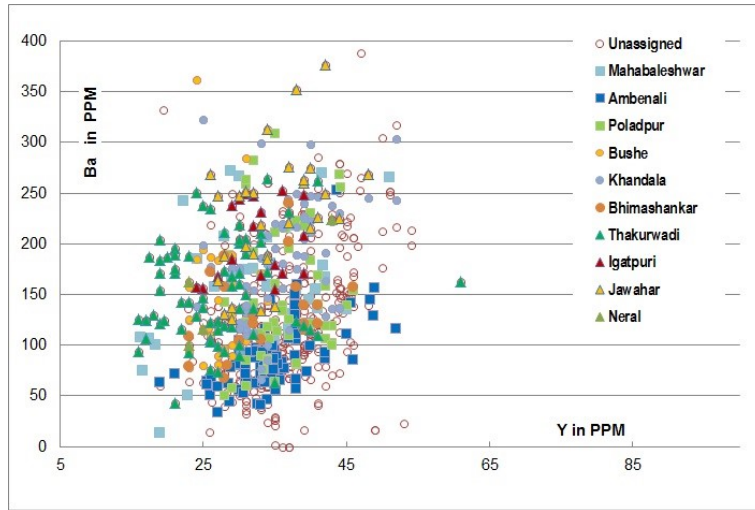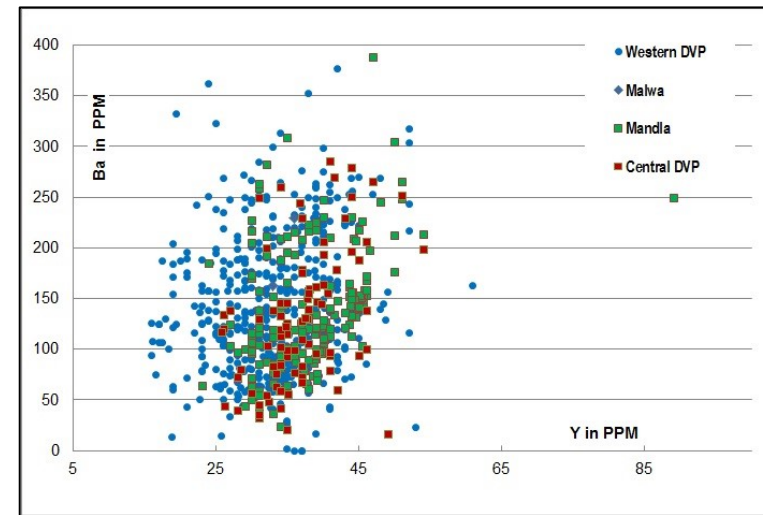

**SD#1 Fig.10:** Distribution of Ba v/s Y in the DVP, with formation names (where assigned by respective authors) tagged to the data points in the left plot and region-wise classification in the right plot.

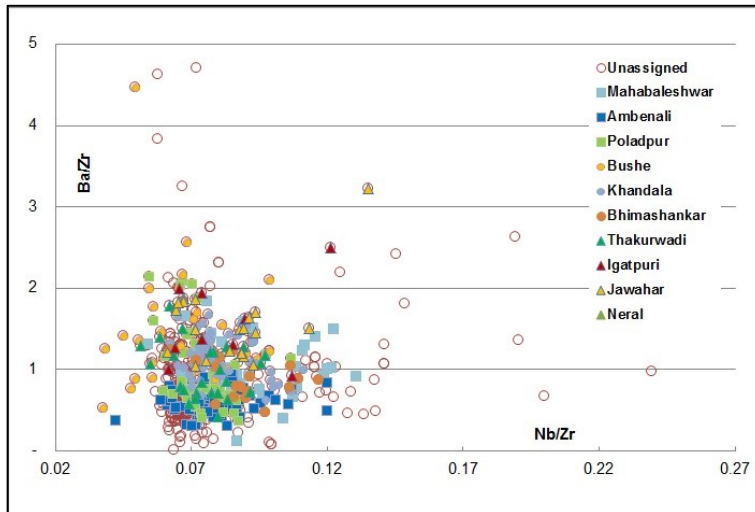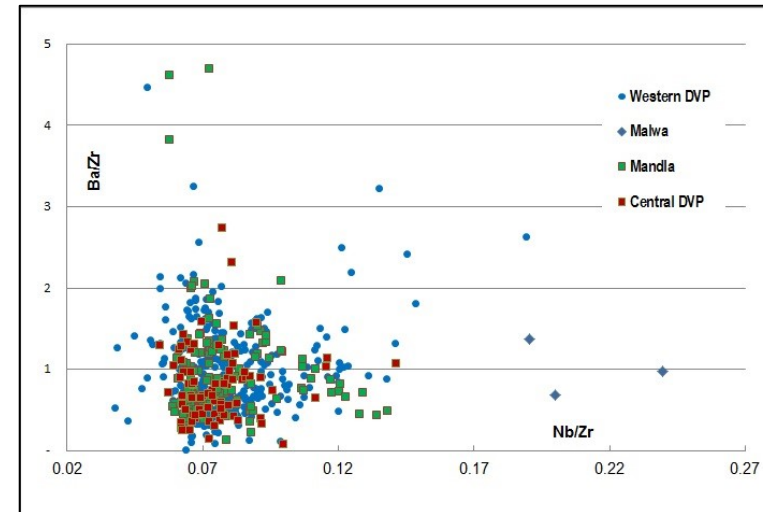

**SD#1 Fig.11:** Distribution of Ba/Zr v/s Nb/Zr in the DVP, with formation names (where assigned by respective authors) tagged to the data points in the left plot and region-wise classification in the right plot.

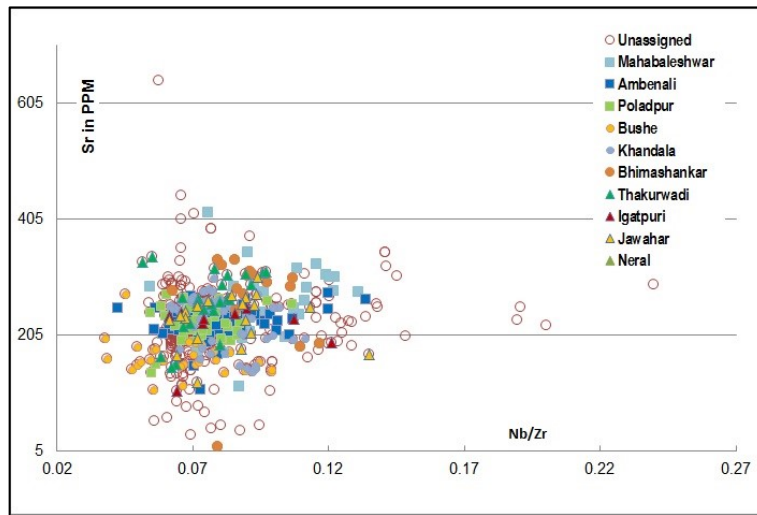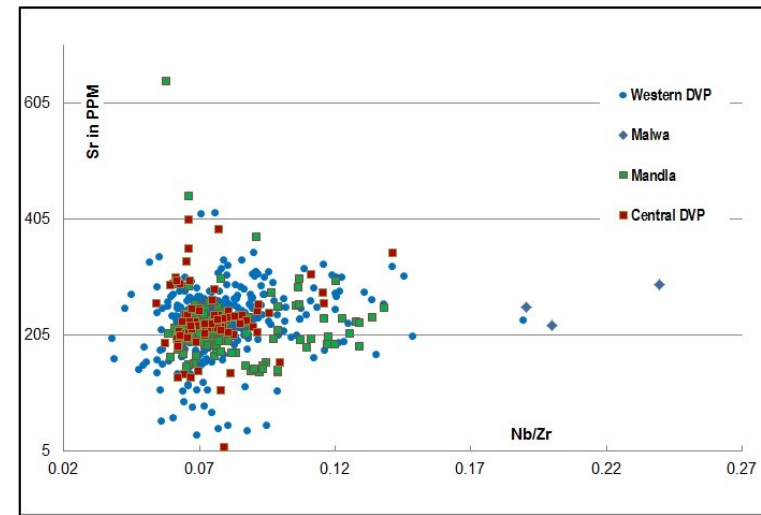

**SD#1 Fig.12:** Distribution of Sr v/s Nb/Zr in the DVP, with formation names (where assigned by respective authors) tagged to the data points in the left plot and region-wise classification in the right plot.

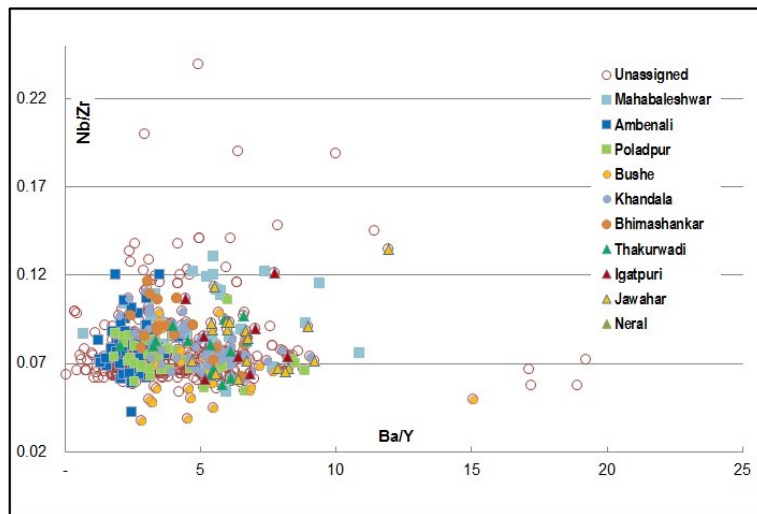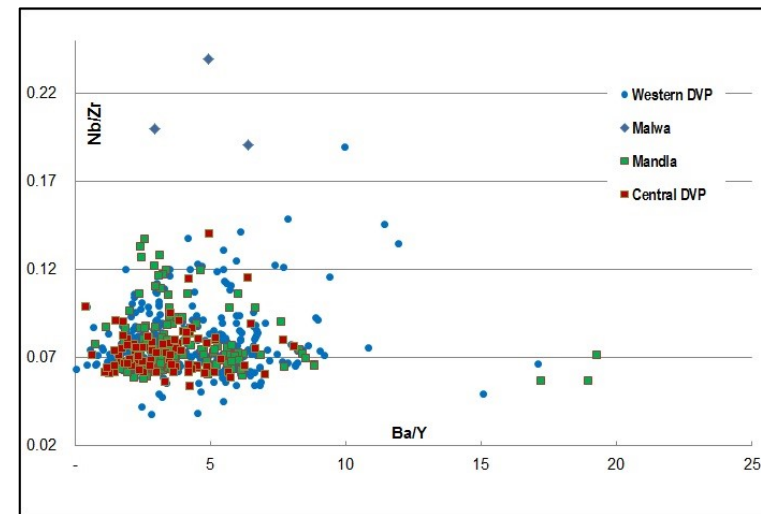

**SD#1 Fig.13:** Distribution of Nb/Zr v/s Ba/Y in the DVP, with formation names (where assigned by respective authors) tagged to the data points in the left plot and region-wise classification in the right plot.

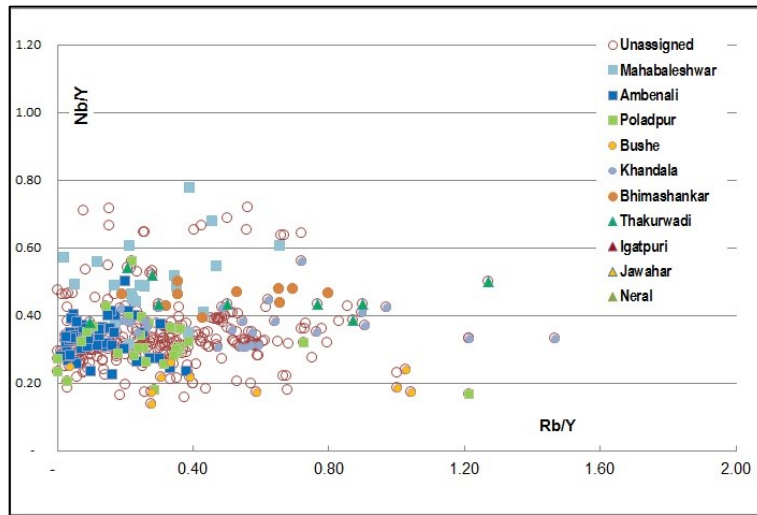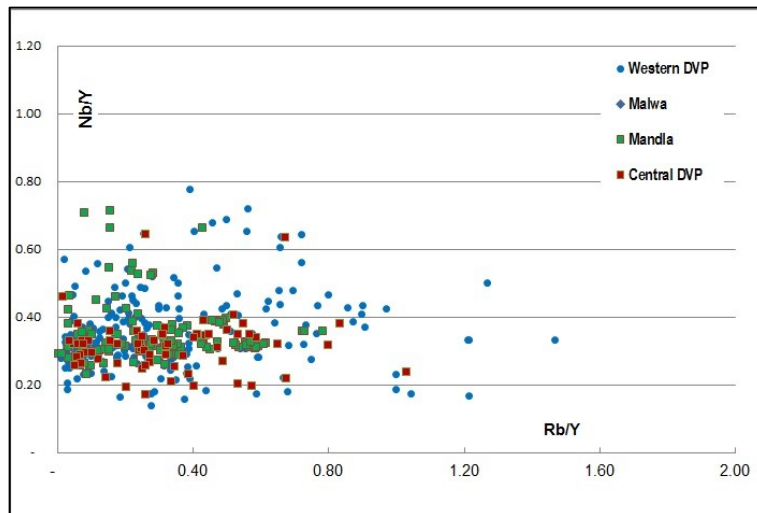

**SD#1 Fig.14:** Distribution of Sr v/s Nb/Zr in the DVP, with formation names (where assigned by respective authors) tagged to the data points in the upper plot and region-wise classification in the lower plot.



We have undertaken the same analyses using the data from the 'unassigned' samples (with known locations which should plot in a specific field) to examine its validity. They lead to results that may at best be qualified as 'indicative' and non-exclusive. Under these circumstances, the utility of even such complex statistical functions is limited to being 'indicative' rather than diagnostic.

Although most proponents of the methodology mention the limitations of the parameters of chemical affinities for tagging and classifying flows, models of the Deccan volcanism and correlations of flow fields across long distances rely on them significantly. We caution that none of the parameters gives a unique unambiguous result, and at best provide a statistical probability.

## **1.6 CONCLUDING REMARKS:**

From the above discussion, it is evident that discriminant analyses and chemical parameters fail to sustain the test of long-distance correlations. They are at best probabilistic suggestion. In absence of supporting arguments and data, they cannot stand on their own.

Our critique on the results of 'chemical discrimination' obtained by various authors is that a significant degree of author(s) bias determines the affiliation of the unknown sample to a specific formation. This may have resulted from the 'sampling being based on earlier published regional maps' where the location was already assigned to a particular formation' or an assumption that at particular altitudes a specific formation is present using the existing overstepping models of eruptive history described in the western parts of the DVP. These discriminant analyses fail to sustain the test of long-distance correlations. As has been noted earlier by other workers (eg: Deshmukh, 1988; Godbole et al., 1996, Kale et al., 1992), correlation or mapping of "Formations" purely based on chemistry is shown by our exercise and compilation to be inherently doubtful. It is evident that while chemistry of the DVP flows may yield excellent petrogenetic information, its utility in defining stratigraphic boundaries and assigning unknown samples to a specific stratigraphic unit may not stand the test of rigorous scrutiny.

The geometric unevenness of the individual flows themselves (see Gupte, et al., 1973; Kale and Kulkarni, 1992; Kale, et al., 1992; Jay, et al., 2008) further augments this limitation. The physical volcanological nature of the lava flows (compiled in SD#2) adds to this complication in no uncertain terms. The fragmented basement on which the flows were emplaced, and dislocations that may have occurred during the volcanic eruptions in the substrate (eg: Peshwa and Kale, 1997) on which the lava spread is an additional factor that suggests that lateral correlation of flows / flow-fields based on elevational controls (with or without corrections for the 'regional dips' as suggested by Cox and Hawkesworth, 1985; Khadri, et al, 1999; Jay, et al., 2008) may be at best indicative, not conclusive. In light of these uncertainties, the long distance correlations of flows based purely on chemistry has obvious limitations that cannot be denied. Several authors who have attempted chemistry-based

extrapolations and correlations admit this factor; but have apparently let it remain unqualified in their conclusions.

While conceding that the chemical data has provided a framework for classifying the thickest succession (in Western DVP) of the Deccan Traps, its application for correlation remains equivocal. The obvious conclusion is that chemistry alone cannot provide the foundation of stratigraphic correlations across the DVP. Supplementary Data on Lithostratigraphy (SD#2) and Chronological and Paleomagnetic (SD#3) further elaborate the ambiguities in using the chemical correlations across the province.

### Bibliography for Chemical data of DVP

(Code nos of analyses in the database (**Data Repository File DR2.xlsx**) derived from specific publications are listed at the end of each citation):

Allmukhamdov, A.I., and Zolotukhin, V.V. (1988) Geochemistry of Low Potassic basalts from Siberian and Deccan Traps. K.V., Ed., Deccan Flood Basalts. Geological Society of India, Memoir, v.10, p. 341-351. **(AZ88 01- AZ88 16)**

Bakshi, A.K. (2001) Rajahmundry Traps, Andhra Pradesh: Evaluation of their petrogenesis relative to the Deccan Traps. Proceedings of the Indian Academy of Science (Earth and Planetary Science), v. 110, p. 397-407. **(BA01 01-BA01 09)**

Bastia, R., Radhakrishna, M., Das, S., Kale, A.S. & Catuneanu, O. (2010) Delineation of the 85°E ridge and its structure in the Mahanadi offshore Basin, eastern continental margin of India (ECMI) from seismic reflection imaging. Marine and Petroleum Geology, v.30, p. 1 – 8.

Beane, J.E., Turner, C.A., Hooper, P.R., Subbarao, K.V. and Walsh, J.N. (1986) Stratigraphy, Composition and form of the Deccan basalts, Western Ghats, India. Bulletin Volcanology, v. 48, p. 61-63. **(BE86 01 - BE86 49)**

Beane J.E., and Hooper, P.R. (1988) A note on the Picrite Basalts of the Western Ghats, Deccan Traps, India. In Subbarao, K.V., Ed., Deccan Flood Basalts. Geological Society of India, Memoir, v.10, p. 117-133. **(BH88 01-BH88 22)**

Bilgrami, S.Z. (1999) A Reconnaissance geological map of the eastern part of the Deccan Trap (Bidar-Nagpur). Geological Society of India, Memoir v. 43(1), p. 219-232. **(BI99 01 - BI99 05)**

Bodas, M.S., Khadri, S.F.R. and Subbarao, K.V. (1988) Stratigraphy of the Jawhar and Igatpuri Formations, Western Ghats lava pile, India, In Subbarao, K.V., Ed., Deccan Flood Basalts. Geological Society of India, Memoir, v.10, p. 235-252. **(BO88 01 - BO88 35)**

Bondre, N.R., Hart, W.K. and Sheth, H.C. (2006) Geology and geochemistry of the Sangamner mafic dike swarm, Western Deccan Volcanic Province, India: implications for regional stratigraphy. Journal Geology, v. 114, p. 155 – 170.

Bose, P.N. (1884) Geology of the Lower Narmada valley between Nimawar and Kawant. Memoirs Geological Survey of India, v. 21 (1), p. 1 - 72.

Bose, M.K. (1980) Alkaline magmatism in the Deccan volcanic province. Journal Geological Society India, v. 21, p. 317 – 329.

Brahmam, N.K., and Negi, J.G. (1973) Rift valleys beneath the Deccan Traps (India): Geophysical Research Bulletin, v. 11, p. 207 - 223.

Brown, R.J., Blake, S., Bondre, N.R., Phadnis, V.M., and Self, S., (2011) A lava flows in the Deccan Volcanic Province, India, and their significance for the nature of continental flood basalt eruptions. Bulletin Volcanology, v. 73, p. 737-752. **(BR11 01 - BR11 11)**

Chandrasekharam, D., Mahoney, J.J., Sheth, H.C. and Duncan, R.A. (1999) Elemental and Nd–Sr–Pb isotope geochemistry of flows and dikes from the Tapi rift, Deccan flood basalt province, India. Journal Volcanology and Geothermal Research, v. 93, p. 111–123.

Cox, K.G. and Hawkesworth, C.J. (1984) Relative contributions of crust and mantle to flood basalt magmatism, Mahabaleshwar area, Deccan Traps, Philosophical Transactions of the Royal Society of London, v. A310, p. 627–641.

Cox, K.G. and Hawkesworth, C.J. (1985) Geochemical stratigraphy of the Deccan Traps at Mahabaleshwar, Western Ghats, India, with implications for open system magmatic processes. Journal of Petrology, v. 26, p. 355–377. **(CH85 01 - CH85 31)**

Dessai, A.G., Markwick, A., Vaselli, O, and Downes, H. (2004) Granulite and pyroxenite xenoliths from the Deccan Trap: insight into the nature and composition of the lower lithosphere beneath cratonic India. Lithos, v. 78; p. 263 – 290.

Deshmukh, S.S. (1988) Petrographic variations in compound flows of Deccan Traps and their significance. In. Subbarao, K.V., Ed., Deccan Flood Basalts, Geological Society of India Memoir, v. 10, p. 305 – 319.

Deshmukh, S.S., Sano, T., and Nair, K.K.K. (1996) Geology and chemical stratigraphy of the Deccan basalts of Chikaldara and Behramghat sections from the Eastern part of the Deccan Trap Province, India. Gondwana Geological Magazine Special Publication, v. 2, p. 1-22. **(DM96 01 - DM96 39)**



- Deshmukh, S.S., Sano, T., Fujji, T., Nair, K.K.K., and Yedekar, D.B. (1996) Chemical stratigraphy and geochemistry of the basalt flows from the central and eastern parts of the Deccan Volcanic Province of India. *Gondwana Geological Magazine, Special Publication*, v. 2, p. 145-170. **(DM96 40 - DM96 72)**
- Devey, C.W. and Lightfoot, P.C. (1986) Stratigraphy and structure in the western Deccan traps. *Bulletin of Volcanology*, v. 48, p. 195–207.
- Devey, C.W., and Stephens W.E. (1999) Tholeiitic dykes in the Seychelles and the original spatial extent of the Deccan. *Journal Geological Society of London*, v. 148, p. 979-983. **(DS99 01 - DS99 06)**
- Duraiswami, R.A., Bondre, N.R. and Managave, S. (2008) Morphology of rubbly pahoehoe (simple) flows from the Deccan Volcanic Province: implications on style of emplacement. *Journal Volcanology and Geothermal Research*, v. 177, p. 822 – 836. **(DU08 01 - DU08 04)**
- Duraiswami, R.A., Dole, G. and Bondre, N.R. (2003) Slabby pahoehoe from the western Deccan Volcanic Province: evidence for incipient pahoehoe – a’ā transitions. *Journal Volcanology and Geothermal Research*, v. 121, p. 195 – 217.
- Duraiswami, R.A., Gadpallu, P., Shaikh, T.N. and Cardin, N. (2014) Pahoehoe – a’ā transitions in the lava flow fields of the western Deccan Traps, India – implications for emplacement dynamics, flood basalt architecture and volcanic stratigraphy. *Journal Asian Earth Sciences*, v. 84, p. 146 – 166. **(DU14 01 - DU14 12)**
- Ganguly, S., Ray, J., Koeberl, C., Saha, A., Thoni, M. and Balaram, V. (2014) Geochemistry and petrogenesis of lava flows around Chhindwara area in the Eastern Deccan Volcanic Province (EDVP), India. *Journal Asian Earth Sciences*, v. 91, p. 174 – 193. **(GA14 01 - GA14 51)**
- Geological Survey of India (2000) Seismotectonic Atlas of India and its environs. *in* Narula P.L., Acharyya S.K., and Banerjee, J., eds. Geological Survey of India Publications, Kolkata.
- Geological Survey of India (2001) District Resources Map Series: for Maharashtra and Madhya Pradesh, Geological Survey of India Publications, Kolkata.
- Godbole, S.M., and Chatterjee, A.K. (1996) A note on the Geochemistry of Lava pile Nazardeo, Jalgaon Dist, Maharashtra. *Gondwana Geological Magazine, Special Publication*, v. 2, p. 81-88. **(GC96 01 - GC96 13)**
- Godbole, S.M., Rana, R.S., and Natu, S.R. (1996) Lava Stratigraphy of Deccan Basalts of Western Maharashtra. (in Eds Deshmukh, S.S. and Nair, K.K.K.) *Deccan Basalts, Special Publication Gondwana Geological Society*, v. 2; p. 125-134. **(GO96 01-GO96 22)**
- Godbole, S.M., Deshmukh, S.S., and Chatterjee, A.K. (1996) Geology and chemical stratigraphy of the basalt flows of Akot-Harisal section from Satpura Ranges in the eastern part of the Deccan Volcanic Province. (in Eds Deshmukh, S.S. and Nair, K.K.K.) *Deccan Basalts, Special Publication Gondwana Geological Society*, v. 2, p. 115-124.
- Harinarayana, T., Patro, B.P.K., Veeraswamy, K., Manoj, C., Naganjaneyulu, K., Murthy, D.N., and Virupakshi, G., (2007) Regional geoelectric structure beneath Deccan Volcanic Province of the Indian subcontinent using magnetotellurics: *Tectonophysics*, v. 445, p. 66 – 80
- Hooper, P.R., Subbarao, K.V. and Beane, J.E. (1988) Giant plagioclase Basalts (GPBs) of the Western Ghats, Deccan Traps. In Subbarao, K.V. (Ed) *Deccan Flood Basalts*, Geological Society of India, Memoir, v. 10; p. 135-144.
- Hooper, P., Widdowson, M. and Kelley, S. (2010) Tectonic setting and timing of the final Deccan flood basalt eruptions: *Geology*, v. 38 (9), p. 839 - 842.
- Jay, A.E. and Widdowson, M. (2008) Stratigraphy, structure and volcanology of the SE Deccan continental flood basalt province: implications for eruptive extent and volumes. *Journal Geological Society, London*, v. 165, p. 177 – 188. **(JW08 01 - JW08 63)**
- Kaila, K.L. (1988) Mapping the thickness of Deccan Trap flows in India from DSS studies and inferences about a hidden Mesozoic Basin in the Narmada-Tapti Region: *In* Subbarao, K.V., ed., *Deccan Flood Basalts: Geological Society of India Memoir*, v. 10, p. 91-116
- Kale, V.S., and Kulkarni, H. C. (1992) IRS 1A and LANDSAT data in Mapping Deccan Trap Flows around Pune, India: Implications on Hydrogeological modelling: *Archives International Society of Photogrammetry and Remote Sensing*, v. 29 (B7), p. 429 - 435.
- Kale, V.S., Kulkarni, H. and Peshwa, V.V. (1992) Discussion on: A geological map of the southern Deccan Traps, India and its structural implications, *Journal Geological Society of London*, v. 149, p. 473 - 478.
- Kale, V.S., and Peshwa, V.V. (1988) Manifestations of the Kurduwadi Lineament based on remote sensor data interpretation: *Current Science*, v. 57, p. 1293 - 1295.
- Karmarkar, B. M Kulkarni, S.R. Marathe, S.S. Sowani, P.V. and Peshwa, V.V. (1971), Giant Phenocryst Basalts in the Deccan Trap. *Bulletin Volcanologique*, v. 35(4), p. 965–974
- Keller, G., Adatte, T., Bajpai, S., Mahobey, D.M., Widdowson, M., Khosla, A., Sharma, R., Khosla, S.C., Gertsch, B., Fleitmann, D. and Sahni, A. (2009 a) K-T transition in Deccan Traps and intertrappean beds in Central India mark major marine seaway across India. *Earth and Planetary Science Letters*, v. 282, p. 10 – 23.
- Keller, G., Sahni, A. and Bajpai, S. (2009 b) Deccan volcanism, the KT mass extinction and dinosaurs. *Journal of Biosciences :Indian Academy of Science*, v. 34; p. 709 – 728.

- Keller, G., Adatte, T., Bhowmick, P.K., Upadhyay, H., Dave, A., Reddy, A.N. and Jaiprakash, B.C. (2012) Nature and timing of extinctions in Cretaceous – Tertiary planktic foraminifera preserved in Deccan intertrappean sediments of the Krishna – Godavari basin, India. *Earth and Planetary Science Letters*, v. 341-344, p. 211 – 221.
- Khadri, S.F.R., Subbarao, K.V., Hooper, P.R. and Walsh, J.N. (1988) Stratigraphy of Thakurvadi Formation, Western Deccan Basalt Province, India. In Subbarao, K.V., Ed., *Deccan Flood Basalts*. Geological Society of India, Memoir, v.10; p. 281-304. **(KH88 01 - KH88 24)**
- Khadri, S.F.R., Subbarao, K.V. and Walsh, J.N. (1999) Stratigraphy, form and structure of the east Pune basalts, western Deccan Basalt Province, India. In Subbarao, K.V. (Ed) *Deccan Volcanic Province*, Geological Society of India, Memoir, v. 43(1); p. 179-203. **(KP99 01 - KP99 57)**
- Khadri, S.F.R., Subbarao, K.V., and Walsh, J.N. (1999) Chemical and magneto-stratigraphy of Malwa Traps around Mognaba Region. In Subbarao, K.V. (Ed) *Deccan Volcanic Province*, Geological Society of India, Memoir, v. 43(1), p. 203-218. **(KM99 01 - KM99 38)**
- Knight, K.B., Renne, P.R., Halkett, A., and White, N., (2003)  $^{40}\text{Ar}/^{39}\text{Ar}$  dating of the Rajahmundry Traps, Eastern India and their relationship to the Deccan Traps. *Earth and Planetary Science Letters*, v. 208, p. 85-99. **(KN03 01 - KN03 11)**
- Krishnan, M.S. (1968) *Geology of India and Burma*, 5<sup>th</sup> Edn. Higginbothams, New Delhi, 536 p.
- Lightfoot, P.C. and Hawkesworth, C.J. (1988) Origin of Deccan Trap Lavas: evidence from combined trace element and Sr–Nd and Pb isotope studies. *Earth and Planetary Science Letters*, v. 91, p. 89–104.
- Lightfoot, P.C., Hawkesworth, C.J., Devey, C.W., Rogers, N.W., van Calsteren, P.W.C. (1990) Source and differentiation of Deccan Trap lavas, implications of geochemical and mineral chemical variations. *Journal of Petrology*, v. 31, p. 1165–1200.
- Mahoney, J.J., Sheth, H.C., Chandrasekharam, D., Peng, Z.X. (2000) Geochemistry of flood basalts of the Toranmal section, Northern Deccan Traps, India: implications for regional Deccan stratigraphy. *Journal of Petrology*, v. 41 (7), p. 1099–1120.
- Mahoney, J.J., Macdougall, J.D., Lugmair, G.W., Murali, A.V., Sankar, Das. M., Gopalan, K. (1982) Origin of the Deccan Trap flows at Mahabaleshwar inferred from Nd and Sr isotopic and chemical evidence. *Earth and Planetary Science Letters*, v.60, p. 47–60.
- Mahoney, J.J., Sheth, H.C., Chandrasekharam, D., Peng, Z.X. (2000) Geochemistry of flood basalts of the Toranmal section, Northern Deccan Traps, India: implications for regional Deccan stratigraphy. *Journal of Petrology*, v. 41 (7), p. 1099–1120. **(MO00 01-MO00 24)**
- Manikyamba, C., Ganguly, S., Santosh, M., Saha, A. and Lakshminaraya, G. (2015) Geochemistry and petrogenesis of Rajahmundry trap basalts of Krishna – Godavari basin, India. *Geoscience Frontiers*, v. 6, p. 437 – 451.
- Misra, A.A., Bhattacharya, G., Mukherjee, S. and Bose, N., (2014) Near N-S paleo-extension in the western Deccan region, India: Does it link strike-slip tectonics with India - Seychelles rifting? *International Journal of Earth Sciences*, v. 103, p. 1645 – 1680.
- Mitchell, C., and Cox, K.G. (1988) A geochemical sketch map of the southern part of the Deccan Province. In Subbarao, K.V. (Ed) *Deccan Flood Basalts*, Geological Society of India, Memoir, v.10; p. 27-33. **(MC88 01 -MC88 08)**
- Mitchell, C. and Widdowson, M. (1991). A geological map of the Southern Deccan Traps, India and its structural implications. *Journal Geological Society London*, v. 148, p. 495–505.
- Najafi, S.J., Cox, K.G., and Sukhwala, R.N. (1981) Geology and Geochemistry of the basalt flows (Deccan Traps) of the Mahad-Mahabaleshwar section, India. In Subbarao, K.V. and Sukhwala, R.N. (Eds) *Deccan volcanism and related basalt provinces in other parts of the world*, Geological Society of India, Memoir, v. 3; p. 300-315.
- Nair, K.K.K., Chatterjee, A.K., and Sano, T. (1996) Stratigraphy and geochemistry of the Deccan basalts along Toranmal section, Western Satpura Region. *Gondwana Geological Magazine*, special Publication, v. 2; p. 23-48. **(NA96 01 - NA96 38)**
- Pascoe, E. H. (1959) *A Manual of the Geology of India and Burma*, 3rd Edn., Government of India Geological Survey, Calcutta, v.2, p. 485-1343.
- Pathak, V., Patil, S.K. and Shrivastava, J.P. (2017) Tectonomagmatic setting of lava packages in the Mandla lobe of the eastern Deccan volcanic province, India: palaeomagnetism and magnetostratigraphic evidence. In Mukherjee, S., Misra, A., Calves, G. and Nemcok, M Eds. *Tectonics of the Deccan Large Igneous Province*. Geological Society Special Publication; no. 445; p. 69 - 94. doi: 10.1144/SP445.3.
- Peng, Z.X., Mahoney, J.J., Hooper, P.R., Harris, C., and Beane, J.E. (1994) A role for lower continental crust in flood basalt genesis? Isotopic and incompatible element study of the lower six formations of the western Deccan Traps. *Geochim.Cosmochim. Acta*, v.58, p. 267–288.
- Peng, Z.X., Mahoney, J.J., Hooper, P.R., Macdougall, J.D., and Krishnamurthy, P. (1998) Basalts of the northeastern Deccan Traps, India: isotopic and elemental geochemistry and relation to southwestern Deccan stratigraphy. *Journal Geophysical Research*, v. 103, p. 29843–29865.
- Peng, Z. X, Mahoney, J.J., Vanderkluysen, V. and Hooper, P.R. (2014) Sr, Nd and Pb isotopic and chemical compositions of central Deccan Traps lavas and relation to southwestern Deccan stratigraphy, *Journal Asian Earth Science*, v. 84, p. 83-94. **(PE14 01 - PE14 52)**

- Patro, B.P.K., and Sarma, S.V.S. (2007) Trap thickness and the subtrappean structures related to mode of eruption in the Deccan Plateau of India: results from magnetotellurics. *Earth Planets Space*, v. 59, p. 75 - 81.
- Peshwa, V.V., and Kale, V.S., 1997, Neotectonics of the Deccan Trap Province: Focus on the Kurduwadi Lineament: *Journal Geophysics*, v. 18, no. 1, p. 77 - 86.
- Peshwa, V.V., Mulay, J.G. and Kale, V.S. (1987) Fracture zones in the Deccan Traps of western and central India: a study based on remote sensing techniques: *Journal Indian Society of Remote Sensing*, v. 15 (1), p. 9 - 17.
- Rajurkar, S.T., Bhate, V.D., and Sharma, S.B. (1990) Lineament fabric of Madhya Pradesh and Maharashtra and its tectonic significance. in Dhoondial, D.P., ed. *Precambrian of Central India: Geological Survey of India Special Publication* v. 28, p. 241-259
- Rajaram, M., Anand, S.P., Erram, V.C. and Shinde, B.N. (2017) Insight into the structure below the Deccan Trap covered region of Maharashtra, India from geopotential data. In Mukherjee, S., Misra, A.A., G. Calvès and M. Nemčok, .Eds *Tectonics of the Deccan Large Igneous Province.*, Geological Society London Special Publication v. 445, p. 219 – 236. doi: 10.1144/SP445.8.
- Ravi Shankar (1991) Thermal and crustal structure of SONATA : A zone of midcontinentnal rifting in Indian Shield. *Journal Geological Society India*, v. 37, p. 211 – 220.
- Ray, R., Shukla, A.D., Sheth, H.C., Ray, J. Duraiswami, R.A., Vanderkluyzen, L., Rautela, C.S. and Mallik, J. (2008) Highly heterogenous Precambrian basement under the central Deccan Traps, India: direct evidence from xenoliths in dykes. *Gondwana Research*, v. 13, p. 375 – 385.
- Sarma, S.V.S., Prasanta, B., Patro, K., Harinaryana, T., Veeraswamy, K., and Sarma, M.V.C. (2004) A magnetotelluric (MT) study across the Koyna seismic zone, western India: evidence for block structure. *Physics of Earth and Planetary Science Interiors*, v. 142, p. 23 – 36.
- Self, S., Jay, A.E., Widdowson, M., and Keszthelyi, L.P. (2008) Correlation of the Deccan and Rajahmundry trap lavas: are these the longest and largest lava flows on Earth? *Journal Volcanological Geothermal Research*, v. 172, p. 3–19.
- Sengupta, S.K., and Deshmukh, S.S. (1996) Petrology and Geochemistry of the Deccan Basalt flows intersected in Salbardi Drill Hole, Eastern Deccan Trap Province, India. *Gondwana Geological Magazine, Special Publication*, v. 2, p. 69-80. **(SG96 01 - SG96 27)**
- Shekhawat, L.S., and Sharma, V.P. (1996) Deccan basalts of Wankaner-Rajkot area, Gujrat. (in Eds Deshmukh, S.S. and Nair, K.K.K.) *Deccan Basalts, Special Publication Gondwana Geological Society*, v. 2, p. 89-100. **(SS96 01 - SS96 11)**
- Sheth, H. (2000) The timing of crustal extension, diking and eruption of the Deccan Flood Basalts. *International Geology Review*, v. 42, p. 1007 – 1016. doi: 10.1080/00206810009465123.
- Sheth, H.C. (2006) The emplacement of pahoehoe lavas on Kilauea and in the Deccan Traps. *Journal Earth System Science*, v. 115, p. 615 – 629.
- Sheth, H.C., Mahoney, J.J., and Chandrasekharam, D. (2004) Geochemical stratigraphy of Deccan flood basalts of the Bijasan Ghat section, Satpura Range, India, *Journal of Asian Earth Science*, v. 23, p. 127-139
- Sheth, H.C., Ray, J.S., Ray, R., Vanderkluyzen, L., Mahoney, J.J., Kumar, A., Shukla, A.D., Das, P., Adhikari, S. and Jana, B. (2009) Geology and geochemistry of Pachmarhi dykes and sills, Satpura Gondwana Basin, central India: problems of dyke-sill flow correlations in the Deccan Traps. *Contributions to Mineralogy and Petrology*, v. 158, pp. 357–380.
- Sheth, H.C., Mahoney, J.J., and Chandrasekharam, D. (2004) Geochemical stratigraphy of Deccan flood basalts of the Bijasan Ghat section, Satpura Range, India, *Journal of Asian Earth Science*, v. 23, p. 127-139. **(SH04 01 - SH04 07)**
- Sheth, H.C., Ray, J.S., Ray, R., Vanderkluyzen, L., Mahoney, J.J., Kumar, A., Shukla, A.D., Das, P., Adhikari, S. and Jana, B. (2009) Geology and geochemistry of Pachmarhi dykes and sills, Satpura Gondwana Basin, central India: problems of dyke-sill flow correlations in the Deccan Traps. *Contributions to Mineralogy and Petrology*, v. 158, p. 357–380.
- Sheth, H.C., Zellmer, G., Demonterova, E.I., Ivanov, A.V., Rohit Kumar, and Patel, R.K. (2014) The Deccan tholeiite lavas and dykes of Ghatkopar–Powai area, Mumbai, Panvel flexure zone: Geochemistry, stratigraphic status, and tectonic significance, *Journal Asian earth Sciences*, v.84, p. 69-82. **(SH14 01-SH14 08)**
- Shrivastava, J.P., Kumar, R. and Rani, N. (2017) Feeder and post Deccan Trap dyke activities in the northern slope of the Satpura mountain: Evidence from new  $^{40}\text{Ar} - ^{39}\text{Ar}$  ages. *Geoscience Frontiers*, v. 8, p. 483 – 492.
- Shrivastava, J.P., Mahoney, J.J. and Kashyap, M.R. (2014) Trace elemental and Nd-Sr-Ph isotopic compositional variation in 37 lava flows of the Mandla lobe and their chemical relation to the western Deccan stratigraphic succession, India. *Mineralogy Petrology*, v. 108 (6), p. 801 – 817. **(SR14 01 - SR14 41)**
- Sreenivasa Rao, M., Reddy, R.M., Subbarao, K.V., Prasad, C.V.R.K. and Radhakrushnamurthy, C. (1985) Chemical and magnetic stratigraphy of parts of Narmada region, Deccan Basalt Province. *Journal Geological Society India*, v. 26(9); p. 617-639.
- Solanki, J.N., Bhattacharya, D.D., Jain, A.K., Mukherjee, A. (1996) Stratigraphy and tectonics of the Deccan Traps of Mandla. (in Eds Deshmukh, S.S. and Nair, K.K.K.) *Deccan Basalts, Special Publication Gondwana Geological Society*, v. 2, p. 101-114. **(SO96 01-SO96 07)**

- Sreenivasa Rao, M., Reddy, R.M., Subbarao, K.V., Prasad, C.V.R.K. and Radhakrishnamurthy, C. (1985) Chemical and magnetic stratigraphy of parts of Narmada region, Deccan Basalt Province. *Journal Geological Society India*, v. 26(9); p. 617-639.
- Subbarao, K.V. Editor (1988) Deccan Flood Basalts. Geological Society India, Memoir, v.10; 393p.
- Subbarao, K.V. Editor (1999) Deccan Volcanic Province. Geological Society India Memoir, v. 43(1 & 2), p. 947.
- Subbarao, K.V., Chandrasekharam, D., Navaneethakrishnan, P. and Hooper, P.R. (1994) Stratigraphy and structure of parts of the Central Deccan basalt province: eruptive models. In: Subbarao, K.V. (Ed.), *Volcanism*. Wiley Eastern Ltd., New Delhi, India, p. 321–332.
- Subbarao, K.V. and Hooper, P.R. (1988) Reconnaissance map of the Deccan Basalt group in the Western Ghats, India. Scale 1: 1,000,000. In Subbarao K.V. (Ed) Deccan Flood Basalts, Geological Society India, Memoir, v.10 (in pouch).
- Subbarao, K.V., Bodas, M.S., Hooper, P.R., and Walsh, J.N. (1988) Petrogenesis of Jawhar and Igatpuri Formations Western Deccan Basalt Province. In Subbarao, K.V., Ed., Deccan Flood Basalts. Geological Society of India, Memoir, v.10; p. 253 – 280. **(SU88 01-SU88 14)**
- Subbarao, K.V., Sreenivasa Rao, M., and Ramasubba Reddy, N. (1988) Use of correlation coefficient patterns in Chemical stratigraphy and Petrology - A case study of the Deccan Volcanic in parts of the Narmada region. In Subbarao, K.V., Ed., Deccan Flood Basalts. Geological Society of India, Memoir, v.10, p. 199 – 212. **(SU88 15-SU88 17)**
- Vanderkluisen, L., Mahoney, J.J., Hooper, P.R., Sheth, H.C. and Ray, R. (2011) The feeder system of the Deccan Traps(India): Insights from dike geochemistry. *Journal of Petrology*, v. 52(2), p. 315 – 343.
- Yedekar, D.B., Aramaki, S., Fujji, T., and Sano, T. (1996) Geochemical signature and stratigraphy of the Chhindwara-Jabalpur-Seoni-Mandla sector of the eastern Deccan Volcanic Province and problems of its correlation. (in Eds Deshmukh, S.S. and Nair, K.K.K.) Deccan Basalts, Special Publication Gondwana Geological Society, v. 2, p. 49-68. **(YE96 01-YE96 38)**
- Valdiya, K.S. (2016) The making of India: geodynamic evolution. Macmillan, New Delhi.
- West, W. D. (1958) The petrography and petrogenesis of forty-eight flows of Deccan Trap penetrated by borings in western India: *Indian National Institute of Science Transactions*, v. 4(1), p. 1 - 56.
