# Supplementary material
Source: publisher figshare collection journal article supplement (https://gsapubs.figshare.com/articles/dataset/_/12541442)
Supplement: Supplementary file 3 [file 1]

## **Supplementary Data #3:**

### **GEOCHRONOLOGICAL DATA**

#### **3.1 GEOCHRONOLOGY**

The Deccan Trap basalts overlie or are interlayered by the sediments of Maastrichtian age along the Narmada valley, while the basalts are overlain by Tertiary sequences in Kutch. Fossils from such Trap-related sediments were used to propose that the Deccan volcanism occurred between Late Cretaceous and Early Tertiary times before the advent of geochronology. Early K-Ar and Ar-Ar ages suggested a wide span for the volcanism in the DVP. Kaneoka (1980) gave a span of over 20 m.y. (84-63 Ma), while Alexander (1981) suggested the range to vary from 102 to 30 Ma. Courtillot et al. (1986) argued for the Maastrichtian age for the lowermost basaltic flows on the basis of Maastrichtian shark found in the upper Lameta beds of Jabalpur. Jaeger et al. (1989) reviewed the fossils from the Infratrappean, Intertrappean and Supratrappean sediments and concluded that the Deccan Traps could have been emplaced in between 73 Ma and 69 Ma.

Courtillot et al. (1988), Duncan and Pyle (1988) and later Hofmann et al. (2000) used Ar-Ar radiometric to propose that the Deccan eruption spanned a short duration of <1 million years. An extended duration of about 5-7 million years for the Western Ghats sequence was advocated by Venkatesan et al. (1993). Widdowson, et al (2000) reported age of  $62.8 \pm 0.2$  Ma for dykes from Goa. Sheth et al. (2001) reported ages of 60 – 61 Ma for the Bombay trachytes from the coastal region of the DVP. Three separate pulses of eruptive activity spanning more than 5 million years in all were inferred by Pande (2002) on the basis of the then available geochronological data. Sheth and Pande (2014) gave ages of  $62.6 \pm 0.6$  Ma for rhyolites from Dongri, thereby providing additional evidence for a Palaeocene phase of late Deccan volcanism. The last phase of Deccan volcanism that occurred in the early Danian C29N, was responsible for the delayed biotic recovery of marine planktons on the basis of biostratigraphy of samples from 10 wells of Krishna- Godavari (K-G) Basin according to Keller et al. (2012).

The geochronological data and assessment of the fossil records from the Trap-related sediments (Baksi, 1994, 2014; Keller et al, 2008, 2009, 2011, 2012, 2016) in the last two decades is cohesive in confirming that the Deccan volcanism straddles the K-Pg Boundary, and had a role to play in the terminal Cretaceous mass extinction event (Self et al. 2008; Richards et al, 2015). Recent geochronological studies (Renne et al., 2015; Parisio et al., 2016; Sprain et al., 2019) have demonstrated that the duration the main pulse of eruptive activity in the Western Ghats sequence is a short one, spanning less than one million years. U-Pb zircon dates are reported by Schoene et al. (2015; 2019) who assumed that the youngest analysed zircon represents the eruptive age of Deccan basalts, although the origin (or source) of zircon in basalt is an open question. A broad correspondence of the Deccan Trap with the K-Pg Boundary is reaffirmed in the most

recent precision dating techniques as well. The question of whether this was enough by itself or a combination of an extra-terrestrial impact and the volcanism together led to the terminal Cretaceous environmental crisis that caused the mass extinctions (Self et al., 2008; Richards et al., 2015; Renne et al., 2015; Schoene et al., 2015, 2019; Sprain et al., 2019) is beyond the scope of this work. What is certain is that all geochronological data indicate that a large volume of basalts was erupted just before the end of the Cretaceous.

### 3.2 RECALIBRATION

Parisio et al. (2016) recalculated Ar-Ar age data to assess the comparability and consequently reliability. We have expanded this using data from sources that provide background information enabling their comparability. All ages are recalculated against Fish Canyon Sanidine (FCs) age of  $28.294 \pm 0.036$  Ma using the methodology given by Renne et al. (2010 & 2011). The published and supplementary data from Venkatesan et al. (1993, 1996), Baksi (1994), Hofmann et al. (2000), Courtillot et al. (2000), Pande et al. (2004), Schöbel et al. (2014), Renne et al. (2015), Shrivastava et al. (2015) have been used in this computation.

The representative age-spectra of recalculated values is depicted in SD#3 Fig.1 and 2. SD#3 Table 1 lists all such ages after recalculating against 523.1 Ma age of MMhb-1 monitor sample.

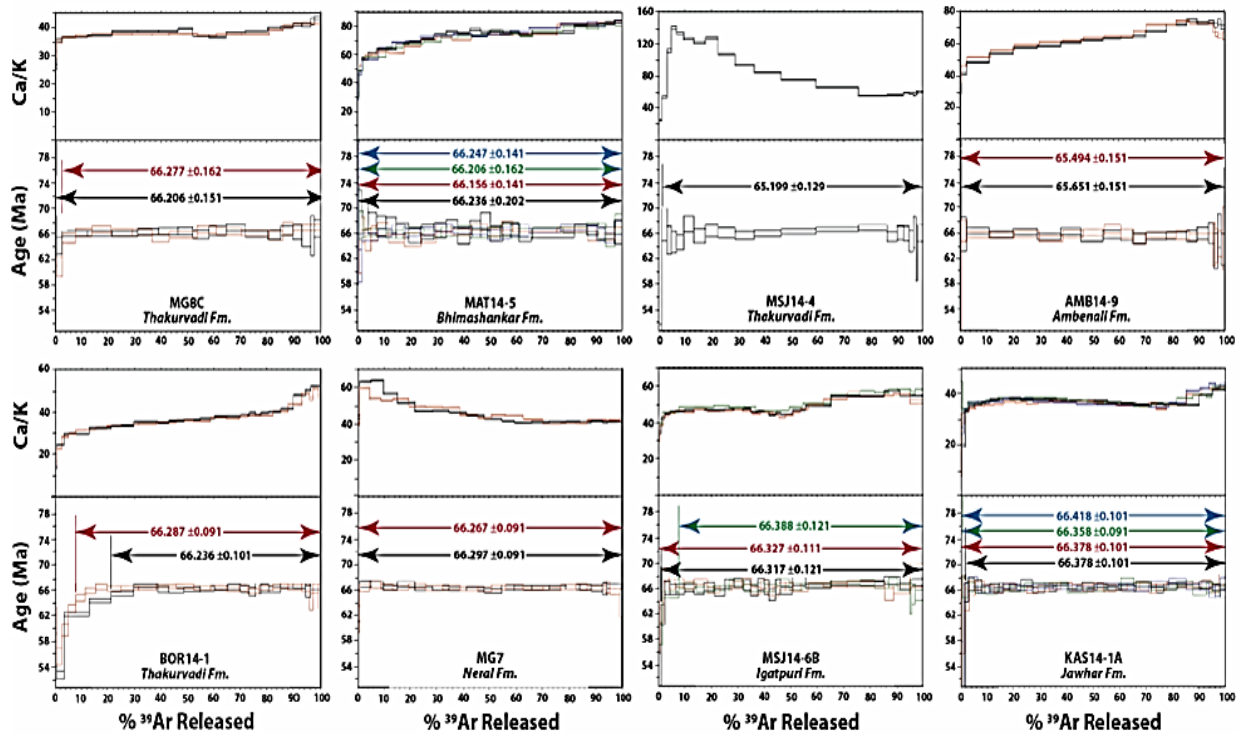

SD#3 Fig. 1:  $^{40}\text{Ar}$ - $^{39}\text{Ar}$  Plagioclase age-spectra of different Formations of Deccan after Renne, et al. (2015).

**SD#3 Table 1:** Recalculated ages of the DVP used in this work based the MMhb-1 monitor sample. The listing is author-wise (with the original standard used) divided into the subprovinces of the DVP. [ND = Not defined by author; \* = isochron ages]

| Sample Name                                           | Formation / Chemical Type | Original Age in Ma | Error (2 $\sigma$ ) | Recalculated Age w.r.t. $FCs=28.294\pm0.03$ Ma |
|-------------------------------------------------------|---------------------------|--------------------|---------------------|------------------------------------------------|
| <b>SAURASHTRA</b>                                     |                           |                    |                     |                                                |
| Venkatesan, et al., 1996 (MMhb-1 = $520.1\pm1.7$ Ma)  |                           |                    |                     |                                                |
| Z199 (WR)                                             | ND                        | 65.7               | 0.7                 | <b>66.7</b>                                    |
| F Lower (WR)                                          | ND                        | 65.2               | 0.6                 | <b>66.2</b>                                    |
| Courtilot, et al., 2000 (Hb3gr=1072 Ma)               |                           |                    |                     |                                                |
| AJ4 (Plg)                                             | ND                        | 64.8               | 0.9                 | <b>65.5</b>                                    |
| AJ3 (WR)                                              | ND                        | 66.8               | 0.5                 | <b>67.5</b>                                    |
| AJ1 (Plg)                                             | ND                        | 66.3               | 0.7                 | <b>64.0</b>                                    |
| AJ11 (Plg)                                            | ND                        | 67.0               | 0.6                 | <b>67.7</b>                                    |
| AJ11 (WR)                                             | ND                        | 66.8               | 0.3                 | <b>67.5</b>                                    |
| <b>MALWA</b>                                          |                           |                    |                     |                                                |
| Schöble, et al., 2014 ( $FCs= 28.294\pm0.03$ Ma)      |                           |                    |                     |                                                |
| S 32 (Plg)                                            | ND                        | 67.12              | 0.44                | <b>67.12</b>                                   |
| S 32 (WR)                                             | ND                        | 67.73              | 0.22                | <b>67.73</b>                                   |
| <b>MANDLA</b>                                         |                           |                    |                     |                                                |
| Shrivastava, et al., 2015 (FCT-3 biotite = 28.201 Ma) |                           |                    |                     |                                                |
| NL-F2/S2 (Plg)                                        | ND                        | 63.7               | 1.2                 | <b>63.9</b>                                    |
| PLB-F12 (Plg)                                         | ND                        | 63.8               | 0.5                 | <b>64.0</b>                                    |
| MK2 (Plg)                                             | ND                        | 63.2               | 1.2                 | <b>63.4</b>                                    |
| SKF10 (Plg)                                           | ND                        | 64.1               | 0.7                 | <b>64.3</b>                                    |
| MK6 (Plg)                                             | ND                        | 64.9               | 1.2                 | <b>65.1</b>                                    |
| <b>WESTERN DVP</b>                                    |                           |                    |                     |                                                |
| Baksi 1994 (FCT-3 biotite = 27.95 Ma)                 |                           |                    |                     |                                                |
| MAP-052MP (WR)                                        | Mahabaleshwar             | 64.9               | 1                   | <b>66.3</b>                                    |
| JEB-339Q (WR)                                         | Neral                     | 65.6               | 1                   | <b>67.0</b>                                    |
| IGA-009Q (WR)                                         | Jawahar                   | 65.6               | 1.2                 | <b>67.0</b>                                    |

SD#3 Table 1: Continued.

| Sample Name                                        | Formation / Chemical Type | Original Age in Ma | Error (2 $\sigma$ ) | Recalculated Age w.r.t. $FCs=28.294\pm0.03$ Ma |
|----------------------------------------------------|---------------------------|--------------------|---------------------|------------------------------------------------|
| Venkatesan et al., 1993 (MMhb= 520.1 $\pm$ 1.7 Ma) |                           |                    |                     |                                                |
| MB81-24 (WR)                                       | Mahabaleshwar             | 62.4               | 0.8                 | <b>63.4</b>                                    |
| AM83-7 (WR)                                        | Mahabaleshwar             | 62.1               | 1                   | <b>63.1</b>                                    |
| MB81-10 (WR)                                       | Ambenali                  | 64.1               | 1                   | <b>65.1</b>                                    |
| MB81-4 (WR)                                        | Ambenali                  | 66.1               | 0.8                 | <b>67.1</b>                                    |
| MB81-3/A (WR)                                      | Poladpur                  | 67                 | 0.8                 | <b>68.0</b>                                    |
| IG82-39 (WR)                                       | Thakurwadi                | 66.8               | 0.6                 | <b>67.8</b>                                    |
| IG82-34 (WR)                                       | Thakurwadi                | 67.5               | 0.6                 | <b>68.5</b>                                    |
| IG82-27 (WR)                                       | Thakurwadi                | 66.5               | 0.8                 | <b>67.6</b>                                    |
| IG82-4 (WR)                                        | Jawahar                   | 66.8               | 0.6                 | <b>67.9</b>                                    |
| Hofmann, et al., 2000 (Hb3gr = 1072 Ma)            |                           |                    |                     |                                                |
| MA2 (Plg)                                          | Mahabaleshwar             | 63.0*              | 2.0                 | <b>63.7</b>                                    |
| JW2 (Plg)                                          | Jawahar                   | 65.7*              | 1.0                 | <b>66.4</b>                                    |
| JW4 (Plg)                                          | Jawahar                   | 65.0               | 1.5                 | <b>65.7</b>                                    |
| JW5 (Plg)                                          | Jawahar                   | 66.2*              | 1.2                 | <b>66.9</b>                                    |
| JW6 (Plg)                                          | Jawahar                   | 65.7               | 1.3                 | <b>66.4</b>                                    |
| JW7 (Plg)                                          | Jawahar                   | 66.5*              | 1.4                 | <b>67.2</b>                                    |
| Pande et al., 2004 (MMhb = 523.2 $\pm$ 0.9 Ma)     |                           |                    |                     |                                                |
| JEB127.1a (WR)                                     | Bushe                     | 66.5               | 0.9                 | <b>67.1</b>                                    |
| JEB127.4b (WR)                                     | Bushe                     | 66.7               | 0.7                 | <b>67.3</b>                                    |

SD#3 Table 1: Continued.

| Sample Name                                   | Formation / Chemical Type | Original Age in Ma | Error (2 $\sigma$ ) | Recalculated Age w.r.t. $FCs=28.294\pm0.03$ Ma |
|-----------------------------------------------|---------------------------|--------------------|---------------------|------------------------------------------------|
| Renne et al., 2015 ( $FCs= 28.294\pm0.03$ Ma) |                           |                    |                     |                                                |
| AMB14-9 (Plg)                                 | Ambenali                  | 65.6               | 0.3                 | <b>65.6</b>                                    |
| MAT14-5(Plg)                                  | Bushe                     | 66.2               | 0.3                 | <b>66.2</b>                                    |
| MSJ14-4 (Plg)                                 | Thakurvadi                | 66.2               | 0.3                 | <b>66.2</b>                                    |
| MG8C (Plg)                                    | Thakurvadi                | 66.2               | 0.2                 | <b>66.2</b>                                    |
| BOR14-1 (Plg)                                 | Thakurvadi                | 66.3               | 0.2                 | <b>66.3</b>                                    |
| MG7 (Plg)                                     | Neral                     | 66.3               | 0.2                 | <b>66.3</b>                                    |
| MSJ14-6 (Plg)                                 | Igatpuri                  | 66.3               | 0.2                 | <b>66.3</b>                                    |
| KAS14-1A(Plg)                                 | Jawahar                   | 66.4               | 0.2                 | <b>66.4</b>                                    |

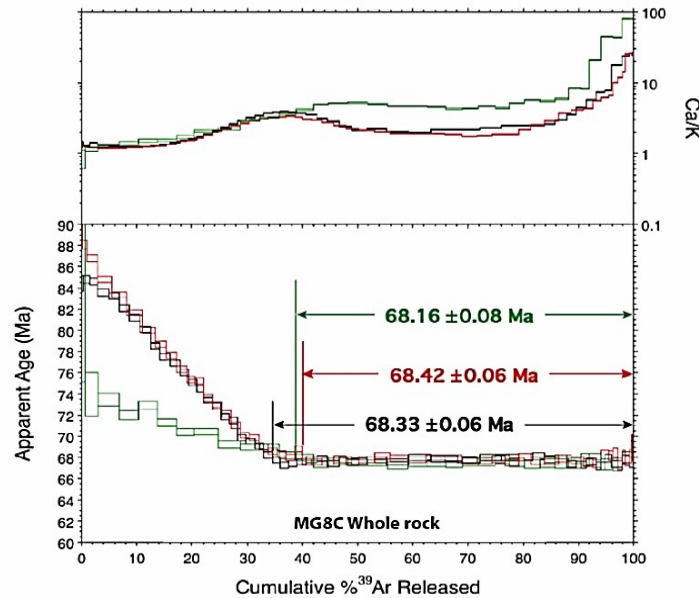

SD#3 Fig. 2:  $^{40}\text{Ar}$ - $^{39}\text{Ar}$  Whole rock ages of three aliquotes of one sample MG8C from Thakurvadi Formation whose plagioclase ages (after Renne et al, 2015) are depicted in SD#3 Fig.1.

The recomputed individual  $^{40}\text{Ar}/^{39}\text{Ar}$  ages were plotted against the respective generalised stratigraphic columns of the subprovinces of the DVP (SD#3 Fig. 3) to examine their distribution. It is evident that (except for one sample – AMB83-7) all the samples from the western DVP sequence of Jawahar to Ambenali yield ages that precede the K-Pg boundary; and are indistinguishable within the limits of the error ranges. The implication being that all these flows (with a reverse polarity corresponding to the 29R chron) must have been erupted within a short time-span. We therefore

conclude that, notwithstanding the chemostratigraphic subgroup boundaries, the sequence from the oldest Jawahar to the Ambenali Formation represent a continuous rapid outpouring of lavas without resolvable break. The Mahabaleshwar flows on the other hand yield a distinctly younger age than the K-Pg Boundary. Their normal polarity justifies their separation from the remaining underlying sequence in the western DVP into a separate volcanic episode. This subdivision based on geochronological data is different from the one indicated by the chemostratigraphic divisions and derivative models based on that (eg: Jay et al., 2009; Richards et al., 2015).

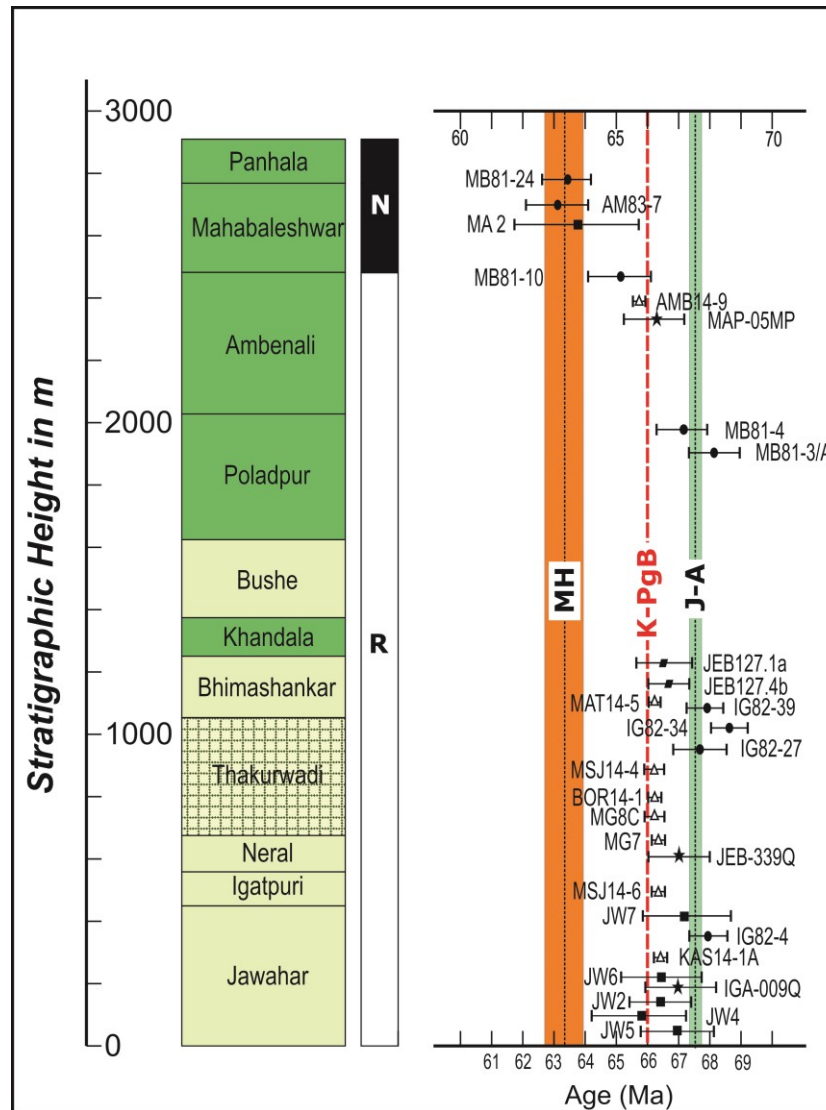

**SD#3 Fig. 3a:** Recomputed ages from Western DVP plotted against their stratigraphic position (using the chemostratigraphic divisions). The weighted means of the two clusters of whole-rock ages are named as J-A (after Jawahar-Ambenali sequence) that is plotted in light green (for the  $2\sigma$  error in the weighted mean age); and MH (for Mahabaleshwar flows) which is plotted as in pale orange (for the  $2\sigma$  error in the weighted mean age). The sample numbers are listed in SD#3 Table1. The paleomagnetic polarity is taken from Chenet et al. (2009) and Jay et al. (2009). The age of the Cretaceous – Paleogene Boundary (K-PgB) marked by thick dashed red line is based on Gradstein et al. (2012) and Renne et al. (2013).

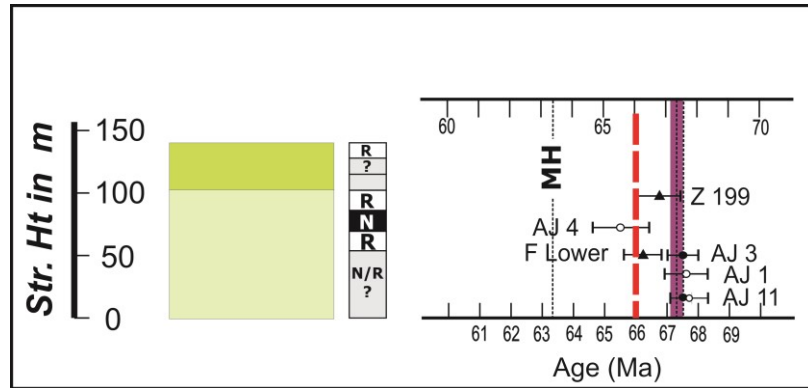

**SD#3 Fig. 3b:** Recomputed ages from Saurashtra subprovince plotted against their stratigraphic position of the sequence of lava flows and magnetic polarity recorded by Venkatesan et al. (1996) and Courtillot et al. (2000). The weighted mean age is depicted as a deep purple bar (for the  $2\sigma$  error). The sample numbers are listed in SD#3 Table1. The age of the Cretaceous – Paleogene Boundary marked by thick dashed red line is based on Gradstein et al. (2012) and Renne et al. (2013).

The geochronological data from the Saurashtra sequence is derived from the Anjar section in Kutch. The weighted mean age of  $67.3 \pm 0.2$  Ma is distinctly Maastrichtian, but is rendered ambiguous by their R-N-R polarity sequence.

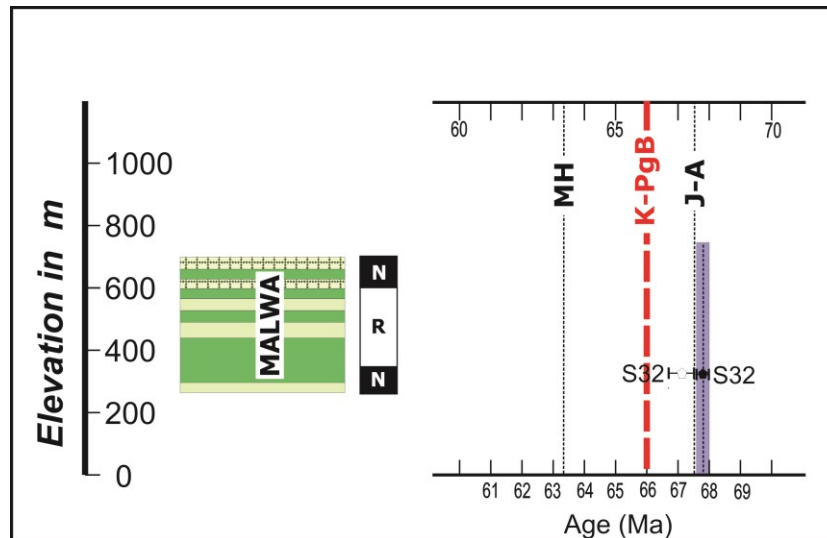

**SD#3 Fig. 3c:** Recomputed ages from Malwa subprovince plotted against their stratigraphic position of the sequence of lava flows recorded by Venkata Rao et al. (1996) and GSI (2001). Note that the stratigraphic column is plotted against the elevations in m above msl rather than stratigraphic heights. The weighted mean age is depicted as a light purple bar (for the  $2\sigma$  error). The sample numbers are listed in SD#3 Table1. The age of the Cretaceous – Paleogene Boundary (K-PgB) marked by thick dashed red line is based on Gradstein et al. (2012) and Renne et al. (2013).

Geochronological data from the Malwa subprovince is limited. It is however certain that the lavas predate the K-Pg Boundary. However, the N-R-N magnetic polarity recorded in this subprovince remains to be suitably tagged.

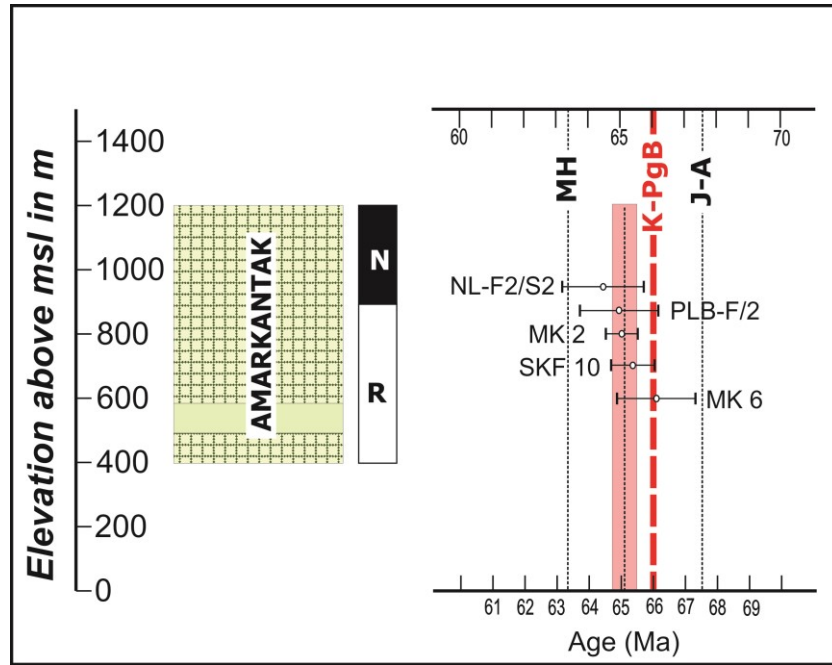

**SD#3 Fig. 3d:** Recomputed ages from Mandla subprovince plotted against their stratigraphic position of the sequence of lava flows recorded by GSI (2001). Note that the stratigraphic column is plotted against the elevations in m above msl rather than stratigraphic heights. The weighted mean age is depicted as a pink bar (for the  $2\sigma$  error). The sample numbers are listed in SD#3 Table1. The age of the Cretaceous – Paleogene Boundary (K-PgB) marked by thick dashed red line is based on Gradstein et al. (2012) and Renne et al. (2013).

All geochronological data of the Mandla subprovince shows that these flows are Danian in age, and post-date the K-Pg Boundary. These ages are much younger than the ages of the Poladpur and Ambenali Formations from the Western DVP with whom a correlation is proposed based on geochemical characters (Shrivastava et al, 2015). It is not easy to reconcile this age difference in the volcanological perspective. The R-N magnetic polarity recorded in this sequence of lavas may not necessarily correspond with the 29R-29N chrons postulated for the sequence in the Western DVP. Pathak et al. (2017) have also expressed similar doubts.

### 3.3 CONCLUDING REMARKS

This compilation of the geochronological data demonstrates that there is a need of a more methodical and wide-spread effort to date various flows from different subprovinces of the DVP. The data is geographically lop-sided and therefore may not be valid (as assumed earlier) to be applicable for the entire province. Detailed implications of this analysis are discussed in the main paper.

This data is explicit in showing that the Deccan volcanism occurred on either side of the K-Pg Boundary. A vast majority of the flows present in the Western DVP, some of those



in Saurashtra and Malwa preceded the K-Pg Boundary and therefore their contribution to the terminal Cretaceous environmental crisis is unquestionable. What is equally evident is that the upper flows in the Western DVP and perhaps the entire Mandla sequence are Danian in age; younger than the K-Pg Boundary. The magnetic polarity recorded in the four subprovinces although partly ambiguous; does not support a temporal correlation between flows. Some of the flows from diverse subprovinces may belong to different magnetic chrons (and consequently have differing ages) even if they show common (normal or reverse) polarity.

In context of models that propose long-distance correlations of flows; the monocentric eruptive history and its punctuations, the available geochronological (and paleomagnetic data) in our opinion is ambiguous. The geochronological and geomagnetic data in fact does not support correlations across subprovinces. Further inputs from future studies are essential for resolving the ambiguity.

### Bibliography for Chronological and Paleomagnetic data of DVP

- Alexander, P. O. (1981). Age and duration of Deccan volcanism. K-Ar evidence. *Memoir Geological Society of India*, v. 3, p.224–258.
- Athavale, R. . N. (1970). Paleomagnetism and Tectonics of a Deccan Trap Lava Sequence at Amarkantak, India. *Journal of Geophysical Research*, v. 75(20), p.4000 – 4006.
- Baksi, A. K. (1994). Geochronological studies on whole-rock basalts, Deccan Traps, India : evaluation of the timing of volcanism relative to the K - T boundary. *Earth and Planetary Science Letters*, v. 121, pp.43–56. doi: 10.1016/0012-821X(94)90030-2.
- Baksi, A.K. (2014) The Deccan Trap – Cretaceous – Paleogene boundary connection: new  $^{40}\text{Ar}/^{39}\text{Ar}$  ages and critical assessment of existing argon data pertinent to this hypothesis. *Journal Asian Earth Sciences*, v. 84, p. 9 – 23.
- Bastia, R., Radhakrishna, M., Das, S., Kale, A.S. & Catuneanu, O. (2010) Delineation of the 85°E ridge and its structure in the Mahanadi offshore Basin, eastern continental margin of India (ECMI) from seismic reflection imaging. *Marine and Petroleum Geology*, v.30, p. 1 – 8.
- Chandrasekharam, D. (1985) Structure and evolution of the western continental margin of India deduced from gravity, seismic, geomagnetic and geochronological studies, *Physics of the Earth Planetary Interiors*, v. 81, pp.186 – 198.
- Chandrasekharam, D. (2003) Deccan flood basalts. In Eds. T.M. Mahadevan, B.R. Arora, B.R. and K.R. Gupta, *Indian continental lithosphere: emerging research trends*, Geological Society of India, Memoir, v. 53, p. 197-214.
- Chenet, A.L., Fluteau, F., Courtillot, V., Gérard, M. and Subbarao, K.V. (2008) Determination of rapid Deccan eruptions across the KTB using paleomagnetic secular variation: (1) Results from a 1200 m-thick section in the Mahabaleshwar escarpment. *Journal Geophysical Research*, v. 113, B04101, 27 pp.
- Chenet, A..L., Courtillot, V., Fluteau, F., Gérard, M., Quidelleur, X., Khadri, S.F.R., Subbarao, K.V., and Thordarson, T. (2009). Determination of rapid Deccan eruptions across the Cretaceous-Tertiary boundary using paleomagnetic secular variation: 2 Constraints from analysis of eight new sections and synthesis for a 3500-m thick composite section. *Journal Geophysical Research*, v. 114, B06103. 38 pp.
- Chenet, A.L., Quidelleur, X., Fluteau, F., Courtillot, V. and Bajpai, S. (2007)  $^{40}\text{K} - ^{39}\text{Ar}$  dating of the main Deccan large igneous province: Further evidence of KTB age and short duration. *Earth Planetary Science Letters*, v. 263, pp. 1 – 15.
- Courtillot, V., Besse, J., Vandamme, D., Montigny, R., Jaeger, J. J., and Cappelletta, H. (1986). Deccan flood basalts at the Cretaceous/Tertiary boundary? *Earth and Planetary Science Letters*, v. 80, p.361–374. doi: 10.1016/0012-821X(86)90118-4.
- Courtillot, V., F'eraud, G., Maluski, H., Vandamme, D., Moreau, M. G., and Besse, J. (1988). Deccan Flood basalts and the Cretaceous/Tertiary boundary. *Nature*, v. 333, p.843–846. doi: 10.1038/332141a0
- Courtillot, V., Gallet, Y., Rocchia, R., F'eraud, G., Robin, E., Hofmann, C. Bhandari, N. and Ghevariya, Z.G. (2000) Cosmic markers,  $^{40}\text{Ar}/^{39}\text{Ar}$  dating and paleomagnetism of the KT sections in the Anjar Area of the Deccan large igneous province, *Earth Planetary Science Letters*, v. 182, pp. 137 – 156.

- Deutsch, E. R., Radakrishnamurty, C., and Saharabudhe, P. W. (1959). Paleomagnetism of the Deccan Traps in the Western Ghats near Poona (India). *Annales de Geophysique*, v. 15, p.39–59. doi: 10.1016/0040-1951(71)90029-1
- Dhandapani, R., and Subbarao, K. V. (1992). Magnetostratigraphy of The Deccan Lavas South of the Narmada River. *Journal of Geological Society of India*, v. 24, p.63–79.
- Duncan, R. A., and Pyle, D. G. (1988). Rapid eruption of the Deccan flood basalts at the Cretaceous/Tertiary boundary. *Nature*, v. 333, p.841–843.
- Geological Survey of India (2001) District Resources Map Series: District-wise sheets of Maharashtra and Madhya Pradesh, Geological Survey of India Publications, Kolkata.
- Gradstein, F.M., Ogg, J.G., Schmitz, M., and Ogg, G.M., eds., 2012, *The Geological Time Scale 2012*: Boston, Massachusetts, USA, Elsevier, v. 1-2, 1176 p.
- Hofmann, C., Féraud, G., and Courtillot, V. (2000).  $^{40}\text{Ar}/^{39}\text{Ar}$  dating of mineral separates and whole rocks from the Western Ghats lava pile: further constraints on duration and age of the Deccan traps. *Earth and Planetary Science Letters*, v. 180, p.13–27. doi: 10.1016/S0012-821X(00)00159-X
- Hooper, P., Widdowson, M., and Kelley, S., 2010 Tectonic setting and timing of the final Deccan flood basalt eruptions. *Geology*, v. 38 (9), p. 839 - 842.
- Jaeger, J. J., Courtillot, V., and Tapponnier, P. (1989). Paleontological view of the ages of the Deccan Traps, the Cretaceous/Tertiary boundary, and the India-Asia collision. *Geology*, v. 17, p.316–319.
- Jay, A.E., MacNiocail, C., Widdowson, M., Self, S., and Turner, W. 2009 New paleomagnetic data from the Mahabaleshwar plateau, Deccan Flood Basalt Province, India: implications on volcanostratigraphic architecture of continental flood basalt provinces. *Journal Geological Society, London*, v. 166, pp. 13 – 24.
- Kaneoka, I. (1980).  $^{40}\text{Ar}/^{39}\text{Ar}$  Dating On Volcanic Rocks of the Deccan Traps, India. *Earth and Planetary Science Letters*, v. 46, pp.233–243.
- Keller, G., Adatte, T., Bhowmick, P. . K., Upadhyay, H., Dave, A., Reddy, A. . N., and Jaiprakash, B. . C. (2012). Nature and timing of extinctions in Cretaceous-Tertiary planktic foraminifera preserved in Deccan intertrappean sediments of the Krishna – Godavari Basin, India. *Earth and Planetary Science Letters*, v. 341–344, p.211–221. doi: 10.1016/j.epsl.2012.06.021
- Keller, G., Adatte, T. Gardin, S., Bartolini, A. and Bajpai, S. (2008) Main Deccan volcanism phase ends near the K-T boundary: Evidence from the Krishna-Godavari Basin, SE India: *Earth and Planetary Science Letters*, v. 268, p. 293-311, doi: 10.1016/j.epsl.2008.01.015.
- Keller, G., Bhowmick, P.K., Upadhyay, H., Dave, A., Reddy, A.N., Jaiprakash, B.C., and Adatte, T. (2011) Deccan volcanism linked to the Cretaceous-Tertiary boundary mass extinction: New evidence from ONGC wells in the Krishna-Godavari Basin: *Geological Society of India Journal*, v. 78, p. 399–428, doi:10.1007/s12594 -011 -0107-3.
- Keller, G., Jaiprakash, B.C. and Reddy, A.N. (2016) Maastrichtian to Eocene subsurface stratigraphy of the Cauvery Basin and correlation with Madagascar: *Journal Geological Society of India*; v. 87, pp. 5 – 34.
- Keller, G., Puneekar, J., and Mateo, P. (2016) Upheavals during the late Maastrichtian: Volcanism, climate and faunal events preceding the end-Cretaceous mass extinction: *Palaeogeography, Palaeoclimatology, Palaeoecology*, v. 441, p. 137–151, doi:10.1016/j.palaeo.2015.06.034.
- Keller, G., Sahni, A. and Bajpai, S. (2009) Deccan volcanism, the KT mass extinction and dinosaurs: *Journal of Bioscience*. v.34, p. 709 – 728: doi: 10.1007/s12038-009-0059-6.
- Khadri, S. F. R. (2003). Occurrence of N-R-N sequence in the Malwa Deccan lava flows to the north of Narmada region, Madhya Pradesh, India. *Current Science*, v. 85, p.1126–1129.
- Khadri, S.F.R., Subbarao, K.V., Hooper, P.R. and Walsh, J.N. (1988) Stratigraphy of Thakurwadi Formation, Western Deccan Basalt Province, India. In Subbarao, K.V. (Ed.) *Deccan Flood Basalts*. Geological Society of India, Memoir, v.10; pp. 281-304.
- Mahobey, D.M. and Udhoji, S.G. (1996) Fauna and Flora from Late Cretaceous (Maastrichtian) non-marine Lameta sediments associated with Deccan Volcanic episode, Maharashtra: its relevance to the K-T Boundary problem, paleoenvironment and palaeogeography. *Gondwana Geological Magazine, Special Publication*, v. 2; pp. 349 - 364.
- Pathak, V., Patil, S.K. and Shrivastava, J.P. (2017) Tectonomagmatic setting of lava packages in the Mandla lobe of the eastern Deccan volcanic province, India: palaeomagnetism and magnetostratigraphic evidence. In Mukherjee, S., Misra, A., Calves, G. and Nemcok, M. (Eds.) *Tectonics of the Deccan Large Igneous Province*. Geological Society London Special Publication; no. 445; pp. 69 - 94. doi: 10.1144/SP445.3.
- Pande, K. (2002). Age and duration of the Deccan Traps, India: A review of radiometric and paleomagnetic constraints. *Proceedings of the Indian Academy of Sciences (Earth and Planetary Sciences)*, 111, 115–123. doi: 10.1007/BF02981139

Pande, K., Pattanayak, S. . K., Subbarao, K. V., Navaneethakrishnan, P., and Venkatesan, T. R. (2004).  $^{40}\text{Ar}$ - $^{39}\text{Ar}$  age of a lava flow from the Bhimashankar Formation, Giravali Ghat, Deccan Traps. *Proceedings of the Indian Academy of Sciences, Earth and Planetary Sciences*, v. 113, p.755–758.

Pariso, L., Jourdan, F., Marzoli, A., Melluso, L., Sethna, S. F., and Bellieni, G. (2016).  $^{40}\text{Ar}/^{39}\text{Ar}$  ages of alkaline and tholeiitic rocks from the northern Deccan Traps: implications for magmatic processes and the K–Pg boundary. *Journal of the Geological Society*, v. 173, pp.679 - 688. doi: 10.1144/jgs2015-133.

Poornachandra Rao, G.V.S. and Bhalla, M.S. (1981) Palaeomagnetism of Dhar traps and drift of the subcontinent during the Deccan volcanism. *Geophysical Journal Royal Astronomical Society*, v. 65, p. 155 – 165.

Renne, P.R., Balco, G., Ludwig, K.R., Mundil, R., and Kyoungwon Min (2011) Response to the comment by W.H. Schwarz et al. on “Joint determination of  $^{40}\text{K}$  decay constants and  $^{40}\text{Ar}^*/^{40}\text{K}$  for the Fish Canyon sanidine standard, and improved accuracy for  $^{40}\text{Ar}/^{39}\text{Ar}$  geochronology” by P.R.Renne et al.,2010. *Geochimica et Cosmochimica Acta*, v. 75: pp. 5097–5100.

Renne, P.R., Deino, A.L., Hilgen, F.J., Kuiper, K.F., Mark, D.F., Mitchell, W.S., III, Morgan, L.E., Mundil, R., and Smit, J. (2013) Time scales of critical events around the Cretaceous-Paleogene boundary: *Science*, v. 339, pp. 684–687. doi: 10.1126/science.1230492.

Renne P.R., Mundil, R. Balco, G. Kyoungwon Min and Ludwig, K.R. (2010) Joint determination of  $^{40}\text{K}$  decay constants and  $^{40}\text{Ar}^*/^{40}\text{K}$  for the Fish Canyon sanidine standard, and improved accuracy for  $^{40}\text{Ar}/^{39}\text{Ar}$  geochronology. *Geochimica et Cosmochimica Acta*, v. 74, pp. 5349-5367.

Renne, P. . R., Sprain, C. . J., Richards, M. . A., Self, S., Vanderkluyzen, L., and Pande, K. (2015). State shift in Deccan Volcanism at the Cretaceous-Paleogene boundary Possibly Induced By Impact. *Science*, v. 350, pp. 76–78.

Richards, M.A., Alvarez, W., Self, S., Karlstrom, L., Renne, P.R., Manga, M., Sprain, C.J., Smit, J., Vanderkluyzen, L., and Gibson, S.A., 2015 Triggering of the largest Deccan Eruptions by the Chicxulub impact. *Geological Society of America Bulletin*, v. 127 (11/12), p. 1507 – 1520.

Schöbel, S., de Wall, H., Ganerød, M., Pandit, M. . K., and Rolf, C. (2014). Magnetostratigraphy and  $^{40}\text{Ar}$ - $^{39}\text{Ar}$  geochronology of the Malwa Plateau region (Northern Deccan Traps), central western India: Significance and correlation with the main Deccan Large Igneous Province sequences. *Journal of Asian Earth Sciences*, v. 89, pp. 28–45. doi: 10.1016/j.jseas.2014.03.022.

Schoene, B., Samperton, K. M., Eddy, M. P., Keller, G., Adatte, T., Bowring, S. A., Gertsch, B. (2015). U-Pb geochronology of the Deccan Traps and relation to the end-Cretaceous mass extinction. *Science*, v. 347, pp. 182–184. doi: 10.1126/science.aaa0118.

Schoene, B., Eddy, M.P., Samperton, K.M., Keller, C.B., Keller, G., Adatte, T., and Khadri, S.F.R. (2019) U-Pb constraints on pulsed eruption of the Deccan Traps across the end-Cretaceous mass extinction: *Science*, v. 363, p. 862 of th  
Self, S., Blake, S., Sharma, K., Widdowson, M. and Sephton, S. (2008) Sulfur and Chlorine in Late Cretaceous Deccan Magmas and eruptive gas release. *Science*, v. 319, pp. 1654 – 1657. doi: 10.1126/science.1152830.

Sheth, H. and Pande, K. (2014) Geological and  $^{40}\text{Ar}/^{39}\text{Ar}$  age constraints on late-stage Deccan rhyolitic volcanism, inter-volcanic sedimentation, and the Panvel flexure from the Dongri area, Mumbai. *Journal of Asian Earth Sciences*, v. 84, pp. 167- 175.

Sheth, H. . C., Pande, K., and Bhutani, R. (2001).  $^{40}\text{Ar}$ - $^{39}\text{Ar}$  ages of Bombay trachytes : evidence for a Palaeocene phase of Deccan volcanism. *Geophysical Research Letters*, v. 28, pp. 3513–3516.

Sheth, H.C., Ray, J.S., Ray, R., Vanderkluyzen, L., Mahoney, J.J., Kumar, A., Shukla, A.D., Das, P., Adhikari, S. and Jana, B. (2009) Geology and geochemistry of Pachmarhi dykes and sills, Satpura Gondwana Basin, central India: problems of dyke-sill flow correlations in the Deccan Traps. *Contributions to Mineralogy and Petrology*, v. 158, pp. 357–380.

Sheth, H.C., Vanderkluyzen, L., Demonterova, E.I., Ivanov, A.V. Savatenkov, V.M. (2018) Geochemistry and  $^{40}\text{Ar}/^{39}\text{Ar}$  geochronology of the Nandurbar – Dhule mafic dyke swarms: dyke-sill-flow correlations and stratigraphic development across the Deccan flood basalt province. *Geological Journal*, doi: 10.1002/gi.3167.

Shrivastava, J.P., Duncan, R.A. and Kashyap, M. (2015) Post-K/Pg younger  $^{40}\text{Ar}$ - $^{39}\text{Ar}$  ages of the Mandla lavas: implications for the duration of the Deccan volcanism. *Lithos*, v. 224–225, pp. 214–224.

Shrivastava, J.P., Kumar, R. and Rani, N. (2017) Feeder and post Deccan Trap dyke activities in the northern slope of the Satpura mountain: Evidence from new  $^{40}\text{Ar}$  –  $^{39}\text{Ar}$  ages. *Geoscience Frontiers*, v. 8, p. 483 – 492.

Sprain, C.J., Renne, P.R., Vanderkluyzen, L., Pande, K., Self, S., and Mittal, T., 2019, The eruptive tempo of Deccan volcanism in relation to the Cretaceous-Paleogene boundary: *Science*, v. 363, p. 866n870.

Subbarao, K.V. and Hooper, P.R. (1988) Reconnaissance map of the Deccan Basalt group in the Western Ghats, India. Scale 1: 1,000,000. In Subbarao K.V. (Ed) *Deccan Flood Basalts*, Geological Society India, Memoir, v.10, in pouch.

Vandamme, D. and Courtillot, V. (1992) Paleomagnetic constraints on the structure of the Deccan traps. *Physics of the Earth and Planetary Interiors*, v. 74, pp. 241-261.

Vandamme, D., Vourtilot, V. Besse, J. and Montigny, R. (1991) Paleomagnetism and age determinations of Deccan traps: results of a Nagpur – Bombay traverse and review of earlier work. *Reviews in Geophysics*. V. 29, p. 159 – 190.

Venkata Rao, K., Nair, K. K. K., and Padhi, R. N. (1996). Magnetostratigraphy of the Deccan Basalt of Western Satpura Region. In Deshmukh, S .S and Nair, K .K .K. (Eds.) *Deccan Basalts*. *Gondwana Geological Magazine*, Special Volume, v. 2, pp. 431–438. [http://doi.org/10.1016/S0969-4765\(04\)00066-9](http://doi.org/10.1016/S0969-4765(04)00066-9)

Venkatesan T R, Pande K and Ghevariya Z G (1996) <sup>40</sup>Ar- <sup>39</sup>Ar ages of Anjar Traps, western Deccan Province (India) and its relation to Cretaceous-Tertiary boundary events; *Current Science*, v.70, pp. 990–996

Venkatesan, T. . R., Pande, K., and Gopalan, K. (1993). Did Deccan volcanism pre-date the Cretaceous/Tertiary transition? *Earth and Planetary Science Letters*, v. 119, pp. 181–189. doi: 10.1016/0012-821X(93)90015-2

Verma, R.K. and Pullaiah, G. (1971) Paleomagnetism study of a Vertical Sequence of Deccan Traps from Jabalpur. *Bulletin of Volcanology*, v. 35, pp. 750–765.

Verma, R.K., Pullaiah, G., Anjaneyulu, G.R. and Mallik, P.K. (1973) Paleomagnetic study of Deccan traps from Jabalpur to Amarkantak., Central India. *Journal Geomagnetism and Geoelectricity*, v. 25, p. 437 – 446.

Widdowson, M., Pringle, M.S. and Fernandez, O.A. (2000) A post K-T Boundary (Early Palaeocene) age for Deccan-type feeder dykes, Goa, India. *Journal of Petrology*, v. 41 (7), pp. 1177 – 1194.

Wensink, H. (1973) Newer paleomagnetic results of the Deccan traps, India. *Tectonophysics*, v.17, pp. 41–59.

Wensink, H. and Klootwijk, C.T. (1971) Paleomagnetism of the Deccan traps in the Western Ghats near Poona (India). *Tectonophysics*, v. 11, p. 175 – 190.
